# Supplementary material for: Characterizing Post-Acute Sequelae of SARS-CoV-2 Infection across Claims and Electronic Health Record Databases
Source: bioRxiv or medRxiv preprint supplement (doi:10.1101/2021.03.19.21253756), 2021-03-24
Supplement: Supplementary file [file media-2.pdf]

Supplementary Appendix#2: Concept Set Codes

Acute Kidney Injury

| Code      | Name                                                                             | Vocabulary |
|-----------|----------------------------------------------------------------------------------|------------|
| 14669001  | Acute renal failure syndrome                                                     | SNOMED     |
| 35455006  | Acute tubular necrosis                                                           | SNOMED     |
| 111407006 | Hemolytic uremic syndrome                                                        | SNOMED     |
| 51292008  | Hepatorenal syndrome                                                             | SNOMED     |
| 429224003 | Acute renal failure due to acute cortical necrosis                               | SNOMED     |
| 61503006  | Acute nephritis                                                                  | SNOMED     |
| 197769007 | Acute pyelonephritis with medullary necrosis                                     | SNOMED     |
| 236392004 | Rapidly progressive glomerulonephritis                                           | SNOMED     |
| 197689003 | Rapidly progressive nephritic syndrome                                           | SNOMED     |
| 200118004 | Post-delivery acute renal failure with postnatal problem                         | SNOMED     |
| 197697005 | Rapidly progressive nephritic syndrome, diffuse crescentic glomerulonephritis    | SNOMED     |
| 733839001 | Postpartum acute renal failure                                                   | SNOMED     |
| 197685009 | Acute nephritic syndrome, diffuse endocapillary proliferative glomerulonephritis | SNOMED     |
| 197684008 | Acute nephritic syndrome, diffuse mesangial proliferative glomerulonephritis     | SNOMED     |
| 716864001 | Hemorrhagic fever with renal syndrome                                            | SNOMED     |
| 197683002 | Acute nephritic syndrome, diffuse membranous glomerulonephritis                  | SNOMED     |
| 197686005 | Acute nephritic syndrome, diffuse mesangiocapillary glomerulonephritis           | SNOMED     |

|           |                                                                                                         |        |
|-----------|---------------------------------------------------------------------------------------------------------|--------|
| 197682007 | Acute nephritic syndrome, focal and segmental glomerular lesions                                        | SNOMED |
| 197693009 | Rapidly progressive nephritic syndrome, diffuse mesangial proliferative glomerulonephritis              | SNOMED |
| 197696001 | Rapidly progressive nephritic syndrome, dense deposit disease                                           | SNOMED |
| 197681000 | Acute nephritic syndrome, minor glomerular abnormality                                                  | SNOMED |
| 197691006 | Rapidly progressive nephritic syndrome, focal and segmental glomerular lesions                          | SNOMED |
| 422593004 | Acute renal failure due to ACE inhibitor                                                                | SNOMED |
| 31005002  | Hepatorenal syndrome due to a procedure                                                                 | SNOMED |
| 197692004 | Rapidly progressive nephritic syndrome, diffuse membranous glomerulonephritis                           | SNOMED |
| 197585004 | Acute diffuse nephritis                                                                                 | SNOMED |
| 236429004 | Acute drug-induced renal failure                                                                        | SNOMED |
| 32093003  | Acute drug-induced tubulointerstitial nephritis                                                         | SNOMED |
| 197584000 | Acute focal nephritis                                                                                   | SNOMED |
| 1.44E+16  | Acute injury of kidney                                                                                  | SNOMED |
| 733137002 | Acute kidney failure stage 1                                                                            | SNOMED |
| 733138007 | Acute kidney failure stage 2                                                                            | SNOMED |
| 733139004 | Acute kidney failure stage 3                                                                            | SNOMED |
| 1.05E+15  | Acute kidney injury due to acute tubular necrosis due to circulatory failure                            | SNOMED |
| 1.05E+15  | Acute kidney injury due to acute tubular necrosis due to circulatory failure with histological evidence | SNOMED |

|           |                                                                                                  |                  |
|-----------|--------------------------------------------------------------------------------------------------|------------------|
| 1.05E+15  | Acute kidney injury due to acute tubular necrosis due to hypovolaemia                            | SNOMED           |
| 1.05E+15  | Acute kidney injury due to acute tubular necrosis due to hypovolaemia with histological evidence | SNOMED           |
| 1.05E+15  | Acute kidney injury due to acute tubular necrosis due to sepsis                                  | SNOMED           |
| 1.05E+15  | Acute kidney injury due to acute tubular necrosis due to sepsis with histological evidence       | SNOMED           |
| 1.05E+15  | Acute kidney injury due to acute tubular necrosis with histological evidence                     | SNOMED           |
| 722095005 | Acute kidney injury due to circulatory failure                                                   | SNOMED           |
| 722096006 | Acute kidney injury due to hypovolemia                                                           | SNOMED           |
| 722278006 | Acute kidney injury due to sepsis                                                                | SNOMED           |
| 726541005 | Acute kidney injury due to trauma                                                                | SNOMED           |
| 8.52E+14  | Acute kidney injury stage 1                                                                      | SNOMED           |
| 8.52E+14  | Acute kidney injury stage 2                                                                      | SNOMED           |
| 8.52E+14  | Acute kidney injury stage 3                                                                      | SNOMED           |
| 88380005  | Acute milk alkali syndrome                                                                       | SNOMED           |
| 197687001 | Acute nephritic syndrome, dense deposit disease                                                  | SNOMED           |
| 4.04E+13  | Acute nephritis due to another disorder                                                          | SNOMED           |
| 58574008  | Acute nephropathy                                                                                | SNOMED           |
| 1.08E+15  | Acute nephrotic syndrome                                                                         | SNOMED           |
| 1.40E+14  | Acute nontraumatic kidney injury                                                                 | SNOMED           |
| 2.70E+16  | Acute on chronic kidney injury                                                                   | Nebraska Lexicon |
| 702718005 | Acute on chronic tubulointerstitial nephritis                                                    | SNOMED           |
| 194909006 | Acute pericarditis secondary to uremia                                                           | SNOMED           |

|           |                                                              |        |
|-----------|--------------------------------------------------------------|--------|
| 438783006 | Acute postoperative renal failure                            | SNOMED |
| 32801008  | Acute pyelitis                                               | SNOMED |
| 14343001  | Acute pyelitis with renal medullary necrosis                 | SNOMED |
| 3999002   | Acute pyelitis without renal medullary necrosis              | SNOMED |
| 197770008 | Acute pyonephrosis                                           | SNOMED |
| 7448003   | Acute pyonephrosis with renal medullary necrosis             | SNOMED |
| 85495007  | Acute pyonephrosis without renal medullary necrosis          | SNOMED |
| 444794000 | Acute renal cortical necrosis                                | SNOMED |
| 3.69E+14  | Acute renal failure caused by contrast agent                 | SNOMED |
| 269257004 | Acute renal failure due to crush syndrome                    | SNOMED |
| 423533009 | Acute renal failure due to ischemia                          | SNOMED |
| 8.42E+14  | Acute renal failure due to non-traumatic rhabdomyolysis      | SNOMED |
| 429489008 | Acute renal failure due to obstruction                       | SNOMED |
| 36225005  | Acute renal failure due to procedure                         | SNOMED |
| 8.48E+14  | Acute renal failure due to traumatic rhabdomyolysis          | SNOMED |
| 1.46E+14  | Acute renal failure due to tubular necrosis                  | SNOMED |
| 71909003  | Acute renal failure following molar AND/OR ectopic pregnancy | SNOMED |
| 8.40E+14  | Acute renal failure induced by aminoglycoside                | SNOMED |
| 8.43E+14  | Acute renal failure induced by animal toxin                  | SNOMED |
| 8.40E+14  | Acute renal failure induced by cisplatin                     | SNOMED |
| 8.40E+14  | Acute renal failure induced by cyclosporin A                 | SNOMED |
| 8.43E+14  | Acute renal failure induced by heavy metal                   | SNOMED |

|           |                                                                     |                  |
|-----------|---------------------------------------------------------------------|------------------|
| 8.40E+14  | Acute renal failure induced by non-steroidal anti-inflammatory drug | SNOMED           |
| 8.43E+14  | Acute renal failure induced by plant toxin                          | SNOMED           |
| 8.45E+14  | Acute renal failure induced by poison                               | SNOMED           |
| 8.45E+14  | Acute renal failure induced by radiographic contrast media          | SNOMED           |
| 8.45E+14  | Acute renal failure induced by solvent                              | SNOMED           |
| 1.30E+14  | Acute renal failure on dialysis                                     | SNOMED           |
| 1.89E+16  | Acute renal failure secondary to lithium toxicity                   | Nebraska Lexicon |
| 430535006 | Acute renal failure with oliguria                                   | SNOMED           |
| 236424009 | Acute renal impairment                                              | SNOMED           |
| 723189000 | Acute renal insufficiency                                           | SNOMED           |
| 236503001 | Acute scleroderma renal crisis                                      | SNOMED           |
| 28637003  | Acute tubulointerstitial nephritis                                  | SNOMED           |
| 236496000 | Acute urate nephropathy                                             | SNOMED           |
| 236433006 | Acute-on-chronic renal failure                                      | SNOMED           |
| 789660001 | Atypical hemolytic uremic syndrome                                  | SNOMED           |
| 444976001 | Congenital hemolytic uremic syndrome                                | SNOMED           |
| 23697004  | Crush syndrome                                                      | SNOMED           |
| 373421000 | Diarrhea-associated hemolytic uremic syndrome                       | SNOMED           |
| 373422007 | Diarrhea-negative hemolytic uremic syndrome                         | SNOMED           |
| 17380002  | Failed attempted termination of pregnancy with acute renal failure  | SNOMED           |
| 62216007  | Familial arthrogyposis-cholestatic hepatorenal syndrome             | SNOMED           |
| 722721004 | Familial hemolytic uremic syndrome                                  | SNOMED           |

|           |                                                                                   |        |
|-----------|-----------------------------------------------------------------------------------|--------|
| 8199003   | Focal embolic nephritis syndrome                                                  | SNOMED |
| 36568005  | Hemolytic uremic syndrome of childhood                                            | SNOMED |
| 78209002  | Hemolytic uremic syndrome, adult type                                             | SNOMED |
| 213231008 | Hepatorenal syndrome as a complication of care                                    | SNOMED |
| 22846003  | Hepatorenal syndrome following delivery                                           | SNOMED |
| 47330001  | Idiopathic acute tubulointerstitial nephritis                                     | SNOMED |
| 445258009 | Idiopathic rapidly progressive glomerulonephritis                                 | SNOMED |
| 33561005  | Illegal termination of pregnancy with acute renal failure                         | SNOMED |
| 4451004   | Illegal termination of pregnancy with renal tubular necrosis                      | SNOMED |
| 609455009 | Induced termination of pregnancy complicated by acute renal failure               | SNOMED |
| 609472002 | Induced termination of pregnancy complicated by acute renal failure with oliguria | SNOMED |
| 609482001 | Induced termination of pregnancy complicated by renal tubular necrosis            | SNOMED |
| 52342006  | Legal termination of pregnancy with acute renal failure                           | SNOMED |
| 20483002  | Legal termination of pregnancy with renal tubular necrosis                        | SNOMED |
| 236428007 | Nephrotoxic acute renal failure                                                   | SNOMED |
| 301814009 | Post-renal renal failure                                                          | SNOMED |
| 236427002 | Post-traumatic acute tubular necrosis                                             | SNOMED |
| 236426006 | Postoperative acute tubular necrosis                                              | SNOMED |

|           |                                                                                                                  |                  |
|-----------|------------------------------------------------------------------------------------------------------------------|------------------|
| 239932005 | Primary pauci-immune necrotizing and crescentic glomerulonephritis                                               | SNOMED           |
| 236432001 | Pulmonary renal syndrome                                                                                         | SNOMED           |
| 3.69E+14  | Rapidly progressive nephritic syndrome co-occurrent and due to membranoproliferative glomerulonephritis type III | SNOMED           |
| 197694003 | Rapidly progressive nephritic syndrome, diffuse endocapillary proliferative glomerulonephritis                   | SNOMED           |
| 197695002 | Rapidly progressive nephritic syndrome, diffuse mesangiocapillary glomerulonephritis                             | SNOMED           |
| 197690007 | Rapidly progressive nephritic syndrome, minor glomerular abnormality                                             | SNOMED           |
| 236451007 | Renal ocular syndrome                                                                                            | SNOMED           |
| 307309005 | Transient acute renal failure                                                                                    | SNOMED           |
| 276586004 | Transient neonatal renal tubular acidosis                                                                        | SNOMED           |
| 2.35E+16  | Transient renal failure                                                                                          | Nebraska Lexicon |
| 236431008 | Traumatic anuria - crush syndrome                                                                                | SNOMED           |
| 418839003 | Tubulointerstitial nephritis with uveitis syndrome                                                               | SNOMED           |

#### Adult Rash

| Code      | Name                                                    | Vocabulary |
|-----------|---------------------------------------------------------|------------|
| 271807003 | Eruption                                                | SNOMED     |
| 11381005  | Acne                                                    | SNOMED     |
| 64144002  | Pruritic rash                                           | SNOMED     |
| 33339001  | Psoriasis with arthropathy                              | SNOMED     |
| 56454009  | Pityriasis versicolor                                   | SNOMED     |
| 49882001  | Viral exanthem                                          | SNOMED     |
| 4776004   | Lichen planus                                           | SNOMED     |
| 77252004  | Pityriasis rosea                                        | SNOMED     |
| 200892002 | Generalized skin eruption caused by drug and medicament | SNOMED     |

|           |                                                              |        |
|-----------|--------------------------------------------------------------|--------|
| 30242009  | Scarlet fever                                                | SNOMED |
| 64540004  | Lichen planopilaris                                          | SNOMED |
| 186668002 | Gammaherpesviral mononucleosis                               | SNOMED |
| 54792008  | Erythematous squamous dermatosis                             | SNOMED |
| 88233000  | Parapsoriasis                                                | SNOMED |
| 186535001 | Eczema herpeticum                                            | SNOMED |
| 111873003 | Measles without complication                                 | SNOMED |
| 238746008 | Acne keloid                                                  | SNOMED |
| 73442001  | Stevens-Johnson syndrome                                     | SNOMED |
| 240302002 | Erythroderma neonatorum                                      | SNOMED |
| 403194002 | Solar erythema                                               | SNOMED |
| 28926001  | Eruption due to drug                                         | SNOMED |
| 34730008  | Primate erythroparvovirus 1 infection                        | SNOMED |
| 34630004  | Pityriasis                                                   | SNOMED |
| 200893007 | Localized skin eruption caused by drug and medicament        | SNOMED |
| 402296004 | Pityriasis alba                                              | SNOMED |
| 37042000  | Guttate psoriasis                                            | SNOMED |
| 68266006  | Hypertrophic lichen planus                                   | SNOMED |
| 54385001  | Exanthema subitum                                            | SNOMED |
| 49706007  | Neonatal acne                                                | SNOMED |
| 20343006  | Pigmented purpuric lichenoid dermatitis of Gougerot and Blum | SNOMED |
| 41890004  | Lichen nitidus                                               | SNOMED |
| 58767000  | Toxic erythema                                               | SNOMED |
| 42228007  | Acne conglobata                                              | SNOMED |
| 23894009  | Acne varioliformis                                           | SNOMED |
| 42442001  | Lichen striatus                                              | SNOMED |
| 86487001  | Acute lichenoid pityriasis                                   | SNOMED |
| 3755001   | Pityriasis rubra pilaris                                     | SNOMED |
| 27520001  | Pustular psoriasis of palms and soles                        | SNOMED |
| 88697005  | Pruritic urticarial papules and plaques of pregnancy         | SNOMED |
| 399992009 | Erythroderma                                                 | SNOMED |
| 23854007  | Small plaque parapsoriasis                                   | SNOMED |
| 10065003  | Excoriated acne                                              | SNOMED |



|           |                                                                   |        |
|-----------|-------------------------------------------------------------------|--------|
| 768962006 | Lyell syndrome                                                    | SNOMED |
| 1.06E+16  | Psoriatic arthritis mutilans                                      | SNOMED |
| 238612002 | Generalized pustular psoriasis                                    | SNOMED |
| 73692007  | Fixed drug eruption                                               | SNOMED |
| 402902002 | Roseola infantum                                                  | SNOMED |
| 19431000  | Rubella arthritis                                                 | SNOMED |
| 58872001  | Erythema elevatum diutinum                                        | SNOMED |
| 65038009  | Fox-Fordyce disease                                               | SNOMED |
| 38921001  | Measles with complication                                         | SNOMED |
| 195900001 | Measles pneumonia                                                 | SNOMED |
| 109254000 | Lichenoid drug eruption                                           | SNOMED |
| 1.25E+14  | Stevens Johnson syndrome AND toxic epidermal necrolysis overlap   | SNOMED |
| 274119009 | Rubella in pregnancy                                              | SNOMED |
| 10954006  | Tropical acne                                                     | SNOMED |
| 371627004 | ACE inhibitor-aggravated angioedema                               | SNOMED |
| 238995004 | Acneiform drug eruption                                           | SNOMED |
| 199192005 | Maternal rubella during pregnancy - baby delivered                | SNOMED |
| 403608009 | Serum sickness due to drug                                        | SNOMED |
| 201002003 | Subacute active lichen planus                                     | SNOMED |
| 16341002  | Parapsoriasis lichenoides                                         | SNOMED |
| 89322006  | Urticaria medicamentosa                                           | SNOMED |
| 68166002  | Keratitis in exanthema                                            | SNOMED |
| 69047008  | Drug-induced photosensitivity                                     | SNOMED |
| 55846006  | Xeroderma of eyelid                                               | SNOMED |
| 186567003 | Rubella with neurological complication                            | SNOMED |
| 67081008  | Large plaque parapsoriasis                                        | SNOMED |
| 83627000  | Phototoxic drug eruption                                          | SNOMED |
| 239812005 | Psoriatic arthritis with distal interphalangeal joint involvement | SNOMED |
| 33090006  | Yabapox                                                           | SNOMED |
| 238752009 | Acne agminata                                                     | SNOMED |
| 72936003  | Acne atrophica                                                    | SNOMED |
| 17332000  | Acne cosmetica                                                    | SNOMED |
| 77816008  | Acne detergentans                                                 | SNOMED |
| 83218005  | Acne estivalis                                                    | SNOMED |

|           |                                                                  |        |
|-----------|------------------------------------------------------------------|--------|
| 4659007   | Acne fulminans                                                   | SNOMED |
| 403350000 | Acne fulminans with erythema nodosum                             | SNOMED |
| 87144001  | Acne indurata                                                    | SNOMED |
| 13101006  | Acne mechanica                                                   | SNOMED |
| 403359004 | Acne nodule                                                      | SNOMED |
| 22920003  | Acne of external chemical origin                                 | SNOMED |
| 402641003 | Acne of external origin                                          | SNOMED |
| 75867005  | Acne rosacea, papular type                                       | SNOMED |
| 201224007 | Acne urticata                                                    | SNOMED |
| 42200001  | Acne venenata                                                    | SNOMED |
| 402642005 | Acne with gram negative folliculitis                             | SNOMED |
| 402644006 | Acneiform eruption                                               | SNOMED |
| 402643000 | Acneiform eruption due to chemical                               | SNOMED |
| 238640007 | Acrokeratosis paraneoplastica of Bazex                           | SNOMED |
| 400018004 | Acrokeratosis verruciformis of Darier disease                    | SNOMED |
| 400085009 | Acrokeratosis verruciformis of Hopf                              | SNOMED |
| 239098009 | Acropustulosis of infancy                                        | SNOMED |
| 200999007 | Actinic lichen planus                                            | SNOMED |
| 402311006 | Actively extending plaque psoriasis                              | SNOMED |
| 721542002 | Acute blistering eruption of skin                                | SNOMED |
| 238550003 | Acute cheiropodopompholyx                                        | SNOMED |
| 721543007 | Acute desquamating eruption of skin                              | SNOMED |
| 723015000 | Acute discoid eruption of skin                                   | SNOMED |
| 723010005 | Acute eruption of skin                                           | SNOMED |
| 723003004 | Acute eruptive lichen planus                                     | SNOMED |
| 723014001 | Acute exudative skin eruption                                    | SNOMED |
| 702617007 | Acute generalized exanthematous pustulosis                       | SNOMED |
| 402327004 | Acute generalized pustular flare of preexisting plaque psoriasis | SNOMED |

|           |                                                          |        |
|-----------|----------------------------------------------------------|--------|
| 402326008 | Acute generalized pustular psoriasis de novo             | SNOMED |
| 402312004 | Acute guttate psoriasis                                  | SNOMED |
| 723012002 | Acute maculopapular eruption of skin                     | SNOMED |
| 723013007 | Acute papular eruption of skin                           | SNOMED |
| 723011009 | Acute purpuric eruption of skin                          | SNOMED |
| 59663001  | Adult premenstrual acne                                  | SNOMED |
| 40175007  | Allergic dermatitis due to bite of Ctenocephalides felis | SNOMED |
| 240854000 | Ancylostomal cutaneous larva migrans                     | SNOMED |
| 720493003 | Annular atrophic lichen planus                           | SNOMED |
| 402745002 | Annular erythema due to drug                             | SNOMED |
| 201000006 | Annular lichen planus                                    | SNOMED |
| 707247006 | Annular oral lichen planus                               | SNOMED |
| 19514005  | Arthritis mutilans                                       | SNOMED |
| 241960008 | Aspirin-induced angioedema-urticaria                     | SNOMED |
| 25858008  | Atrophic lichen planus                                   | SNOMED |
| 238663002 | Atrophic oral lichen planus                              | SNOMED |
| 238619006 | Atypical adult pityriasis rubra pilaris                  | SNOMED |
| 238622008 | Atypical juvenile pityriasis rubra pilaris               | SNOMED |
| 725148000 | Atypical lichen myxedematosus                            | SNOMED |
| 240483006 | Atypical measles                                         | SNOMED |
| 403622009 | B-cell pseudolymphoma due to drug                        | SNOMED |
| 402858006 | Bowel-bypass syndrome                                    | SNOMED |
| 53354003  | Bromide acne                                             | SNOMED |
| 201215003 | Bromine acne                                             | SNOMED |
| 8007005   | Bromoderma                                               | SNOMED |
| 35189002  | Bullae AND sweat gland necrosis in drug-induced coma     | SNOMED |
| 6111009   | Bullous lichen planus                                    | SNOMED |
| 298139006 | Bullous weal                                             | SNOMED |

|           |                                                    |        |
|-----------|----------------------------------------------------|--------|
| 240656001 | Chagas' exanthem                                   | SNOMED |
| 2.40E+14  | Chickenpox exanthem                                | SNOMED |
| 402328009 | Childhood pustular psoriasis                       | SNOMED |
| 83684005  | Chlorine acne                                      | SNOMED |
| 31922003  | Chronic generalized exfoliative dermatitis         | SNOMED |
| 402309002 | Chronic guttate pattern psoriasis                  | SNOMED |
| 402307000 | Chronic large plaque psoriasis                     | SNOMED |
| 402349005 | Chronic lichen planus                              | SNOMED |
| 711435001 | Chronic migratory panniculitis                     | SNOMED |
| 238587006 | Chronic prurigo                                    | SNOMED |
| 402308005 | Chronic small plaque psoriasis                     | SNOMED |
| 402310007 | Chronic stable plaque psoriasis                    | SNOMED |
| 238617008 | Circinate and annular pustular psoriasis           | SNOMED |
| 238621001 | Circumscribed juvenile pityriasis rubra pilaris    | SNOMED |
| 238618003 | Classical adult pityriasis rubra pilaris           | SNOMED |
| 238620000 | Classical juvenile pityriasis rubra pilaris        | SNOMED |
| 247468003 | Closed comedone                                    | SNOMED |
| 201218001 | Colloid acne                                       | SNOMED |
| 238744006 | Comedonal acne                                     | SNOMED |
| 247467008 | Comedone                                           | SNOMED |
| 238645002 | Confluent lichen planus                            | SNOMED |
| 722391005 | Congenital lethal erythroderma                     | SNOMED |
| 59721007  | Congenital syphilitic pemphigus                    | SNOMED |
| 240561005 | Corona veneris                                     | SNOMED |
| 240546009 | Coxsackie virus exanthem                           | SNOMED |
| 19362000  | Cutaneous larva migrans                            | SNOMED |
| 16429005  | Cutaneous larva migrans by Ancylostoma braziliense | SNOMED |
| 73532000  | Cutaneous larva migrans by Ancylostoma caninum     | SNOMED |

|           |                                                  |                  |
|-----------|--------------------------------------------------|------------------|
| 442081006 | Cutaneous larva migrans due to Uncinaria         | SNOMED           |
| 240855004 | Cutaneous strongyloidiasis                       | SNOMED           |
| 13277001  | Cystic acne                                      | SNOMED           |
| 784339002 | Deficiency of interleukin 36 receptor antagonist | SNOMED           |
| 371062005 | Demodex acne                                     | SNOMED           |
| 238588001 | Dermographic prurigo                             | SNOMED           |
| 2.80E+16  | Diffuse papular eruption                         | Nebraska Lexicon |
| 402298003 | Diffuse pityriasis alba                          | SNOMED           |
| 81856009  | Disseminate infundibulo-folliculitis             | SNOMED           |
| 238813009 | Drug exanthem                                    | SNOMED           |
| 241958006 | Drug-aggravated angioedema-urticaria             | SNOMED           |
| 238992001 | Drug-induced erythroderma                        | SNOMED           |
| 238997007 | Drug-induced ichthyosiform reaction              | SNOMED           |
| 403626007 | Drug-induced pellagra                            | SNOMED           |
| 277805004 | Drug-induced persistent light reaction           | SNOMED           |
| 238994000 | Drug-induced pseudolymphomatous eruption         | SNOMED           |
| 403609001 | Drug-induced Stevens-Johnson syndrome            | SNOMED           |
| 297941009 | Drug-induced toxic erythema                      | SNOMED           |
| 238603004 | Eczematized psoriasis                            | SNOMED           |
| 240482001 | Enteroviral exanthem                             | SNOMED           |
| 77470003  | Enteroviral exanthematous fever                  | SNOMED           |
| 238667001 | Erosive lichen planus of lips                    | SNOMED           |
| 721212001 | Erosive lichen planus of vagina                  | SNOMED           |
| 238669003 | Erosive lichen planus of vulva                   | SNOMED           |
| 238662007 | Erosive oral lichen planus                       | SNOMED           |
| 238733003 | Erosive pustular dermatosis of the scalp         | SNOMED           |
| 713528004 | Eruption of skin caused by antiretroviral drug   | SNOMED           |
| 713316008 | Eruption of skin co-occurrent with human         | SNOMED           |

|           |                                                     |        |
|-----------|-----------------------------------------------------|--------|
|           | immunodeficiency virus infection                    |        |
| 403868009 | Eruptive basal cell papillomata                     | SNOMED |
| 238711000 | Eruptive lentiginosis                               | SNOMED |
| 77300003  | Erythema gyratum repens                             | SNOMED |
| 22972008  | Erythema multiforme, dermal type                    | SNOMED |
| 73658009  | Erythema multiforme, epidermal type                 | SNOMED |
| 86563000  | Erythema multiforme, mixed dermal-epidermal type    | SNOMED |
| 76097009  | Erythema nodosum migrans                            | SNOMED |
| 763767006 | Erythema palmare hereditarium                       | SNOMED |
| 204919003 | Erythematous pinta plaque                           | SNOMED |
| 403620001 | Erythroderma due to vancomycin                      | SNOMED |
| 733206005 | Erythroderma in infancy                             | SNOMED |
| 402300003 | Erythroderma of unknown etiology                    | SNOMED |
| 78631004  | Erythromelanosis follicularis of face AND/OR neck   | SNOMED |
| 735958007 | Exanthem caused by Chlamydophila psittaci           | SNOMED |
| 423333008 | Exanthem due to chicken pox                         | SNOMED |
| 428633000 | Exanthem due to herpes zoster                       | SNOMED |
| 424306000 | Exanthem due to measles virus                       | SNOMED |
| 238812004 | Exanthematous disorder                              | SNOMED |
| 43591003  | Exanthematous infectious disease                    | SNOMED |
| 239099001 | Facial Afro-Caribbean childhood eruption            | SNOMED |
| 403209006 | Familial actinic prurigo                            | SNOMED |
| 403210001 | Familial actinic prurigo of lip                     | SNOMED |
| 402860008 | Febrile ulceronecrotic pityriasis lichenoides acuta | SNOMED |
| 22583005  | Fixed drug eruption due to phenolphthalein          | SNOMED |
| 400108007 | Flexural lichen planus                              | SNOMED |
| 238600001 | Flexural psoriasis                                  | SNOMED |

|           |                                                     |        |
|-----------|-----------------------------------------------------|--------|
| 403372003 | Fox-Fordyce disease of axillae                      | SNOMED |
| 403373008 | Fox-Fordyce disease of vulva                        | SNOMED |
| 402292002 | Frictional lichenoid eruption                       | SNOMED |
| 717055000 | Frontal fibrosing alopecia                          | SNOMED |
| 123705009 | Generalized exfoliative contact dermatitis          | SNOMED |
| 238613007 | Generalized pustular psoriasis of pregnancy         | SNOMED |
| 38360005  | Generalized pustular psoriasis of von Zumbush       | SNOMED |
| 28840001  | Generalized pustular psoriasis, exanthematous type  | SNOMED |
| 725119006 | Generalized rash                                    | SNOMED |
| 238668006 | Genital lichen planus                               | SNOMED |
| 240467006 | Genital Molluscum contagiosum                       | SNOMED |
| 233625007 | Giant cell pneumonia                                | SNOMED |
| 403357002 | Giant comedo                                        | SNOMED |
| 238632001 | Giant porokeratosis                                 | SNOMED |
| 240860000 | Gnathostomal cutaneous larva migrans                | SNOMED |
| 402958005 | Gonococcal bacteremia-induced pustular vasculitis   | SNOMED |
| 718215008 | Graham Little Piccardi Lassueur syndrome            | SNOMED |
| 238682006 | Granuloma multiforme                                | SNOMED |
| 397845003 | Granulomatous rosacea                               | SNOMED |
| 22818000  | Granulosis rubra nasi                               | SNOMED |
| 402313009 | Guttate flare of psoriasis with preexisting plaques | SNOMED |
| 238647005 | Guttate lichen planus                               | SNOMED |
| 2176006   | Halogen acne                                        | SNOMED |
| 403624005 | Halogen eruption                                    | SNOMED |
| 70139002  | Harara                                              | SNOMED |
| 201016008 | Hebra's prurigo                                     | SNOMED |
| 240485004 | Hemorrhagic rubella                                 | SNOMED |
| 2.49E+15  | Herpes zoster of skin of neck                       | SNOMED |
| 247466004 | Herpetiform eruption                                | SNOMED |
| 403354009 | Hydration acne                                      | SNOMED |
| 200832000 | Hydroa estivale                                     | SNOMED |
| 238664008 | Hypertrophic oral lichen planus                     | SNOMED |

|           |                                                |        |
|-----------|------------------------------------------------|--------|
| 721171007 | Hypertrophic vulval lichen planus              | SNOMED |
| 201219009 | Infantile acne                                 | SNOMED |
| 238616004 | Infantile pustular psoriasis                   | SNOMED |
| 238815002 | Infectious mononucleosis ampicillin reaction   | SNOMED |
| 238370005 | Infectious mononucleosis exanthem              | SNOMED |
| 428101005 | Inflammatory acne                              | SNOMED |
| 32226008  | Iodide acne                                    | SNOMED |
| 201217006 | Iodine acne                                    | SNOMED |
| 89414003  | Iododerma                                      | SNOMED |
| 410482007 | Iritis in psoriatic arthritis                  | SNOMED |
| 47277009  | Izumi fever                                    | SNOMED |
| 238743000 | Juvenile acne                                  | SNOMED |
| 239802003 | Juvenile psoriatic arthritis                   | SNOMED |
| 239803008 | Juvenile psoriatic arthritis with psoriasis    | SNOMED |
| 239804002 | Juvenile psoriatic arthritis without psoriasis | SNOMED |
| 238615000 | Juvenile pustular psoriasis                    | SNOMED |
| 238609000 | KVÉ-ðbner psoriasis                            | SNOMED |
| 402348002 | KVÉ-ðbner reaction from lichen planus          | SNOMED |
| 238628007 | Keratosis circumscripta                        | SNOMED |
| 238611009 | Lapiere type of psoriasis                      | SNOMED |
| 102606000 | Leser-TrVÉ-©lat sign                           | SNOMED |
| 721180007 | Lichen planopilaris of vulva                   | SNOMED |
| 726476005 | Lichen planus co-occurrent with onycholysis    | SNOMED |
| 201001005 | Lichen planus obtusus                          | SNOMED |
| 718068005 | Lichen planus of gingiva                       | SNOMED |
| 238671003 | Lichen planus of glans penis                   | SNOMED |
| 238666005 | Lichen planus of lips                          | SNOMED |
| 238658001 | Lichen planus of nail                          | SNOMED |
| 238656002 | Lichen planus of palms and soles               | SNOMED |
| 238670002 | Lichen planus of penis                         | SNOMED |
| 238655003 | Lichen planus of scalp                         | SNOMED |
| 238665009 | Lichen planus of tongue                        | SNOMED |
| 237112004 | Lichen planus of vulva                         | SNOMED |
| 238653005 | Lichen planus pemphigoides                     | SNOMED |
| 717061002 | Lichen planus pigmentosus                      | SNOMED |



|           |                                                                                     |        |
|-----------|-------------------------------------------------------------------------------------|--------|
| 238652000 | Lichen planus-lupus erythematosus overlap                                           | SNOMED |
| 3358001   | Lichen ruber moniliformis                                                           | SNOMED |
| 724465009 | Lichen simplex of male genitalia                                                    | SNOMED |
| 4859009   | Lichen spinulosus                                                                   | SNOMED |
| 373603008 | Lichen verrucosus et reticularis                                                    | SNOMED |
| 238530002 | Light - exacerbated acne                                                            | SNOMED |
| 44509000  | Linear lichen planus                                                                | SNOMED |
| 51696001  | Lipogranulomatosis subcutanea of Rothmann and Makai                                 | SNOMED |
| 248413004 | Liver palms                                                                         | SNOMED |
| 724877007 | Localized eruption of skin                                                          | SNOMED |
| 402297008 | Localized pityriasis alba                                                           | SNOMED |
| 81271001  | Localized pustular psoriasis                                                        | SNOMED |
| 403358007 | Macrocomedone                                                                       | SNOMED |
| 238453003 | Maculae ceruleae                                                                    | SNOMED |
| 271756005 | Macular eruption                                                                    | SNOMED |
| 240558009 | Macular syphilide                                                                   | SNOMED |
| 238814003 | Maculopapular drug eruption                                                         | SNOMED |
| 247471006 | Maculopapular eruption                                                              | SNOMED |
| 240677003 | Maculopapular yaws                                                                  | SNOMED |
| 199194006 | Maternal rubella during pregnancy - baby not yet delivered                          | SNOMED |
| 199193000 | Maternal rubella in the puerperium - baby delivered during current episode of care  | SNOMED |
| 199195007 | Maternal rubella in the puerperium - baby delivered during previous episode of care | SNOMED |
| 2.40E+14  | Measles virus exanthem                                                              | SNOMED |
| 186562009 | Measles with intestinal complications                                               | SNOMED |
| 238425003 | Meningococcal rash                                                                  | SNOMED |
| 238646001 | Micropapular lichen planus                                                          | SNOMED |
| 298138003 | Micropapular weal                                                                   | SNOMED |
| 240484000 | Modified measles                                                                    | SNOMED |

|           |                                                |        |
|-----------|------------------------------------------------|--------|
| 397515005 | Molluscum contagiosum blepharoconjunctivitis   | SNOMED |
| 765782003 | Molluscum contagiosum infection of eyelid      | SNOMED |
| 765783008 | Molluscum contagiosum skin infection           | SNOMED |
| 247470007 | Morbilloform eruption                          | SNOMED |
| 301447009 | Multimorphic rash                              | SNOMED |
| 403356006 | Multiple "sandpaper" type comedones            | SNOMED |
| 238660004 | Mutilating lichen planus of fingers and toes   | SNOMED |
| 402340009 | Nail dystrophy due to pityriasis rubra pilaris | SNOMED |
| 238659009 | Nail pterygium in lichen planus                | SNOMED |
| 762543009 | Necrolytic acral erythema                      | SNOMED |
| 15576007  | Necrolytic migratory erythema                  | SNOMED |
| 232242004 | Neurodermatitis of external ear                | SNOMED |
| 111200005 | Nodular elastosis with cysts and comedones     | SNOMED |
| 238745007 | Nodulocystic acne                              | SNOMED |
| 403610006 | Non-pigmenting fixed drug eruption             | SNOMED |
| 724511006 | Nonerosive lichen planus of oral mucosa        | SNOMED |
| 241959003 | NSAID-induced angioedema-urticaria             | SNOMED |
| 275955005 | O/E - allergic rash                            | SNOMED |
| 164375004 | O/E - blackheads                               | SNOMED |
| 164358005 | O/E - deep seated pustules                     | SNOMED |
| 164427005 | O/E - discoid rash                             | SNOMED |
| 391168003 | O/E - dribble rash                             | SNOMED |
| 164359002 | O/E - follicular pustules                      | SNOMED |
| 304386008 | O/E - itchy rash                               | SNOMED |
| 164328004 | O/E - macules                                  | SNOMED |
| 164330002 | O/E - macules present                          | SNOMED |
| 164357000 | O/E - purulent pustules                        | SNOMED |
| 164354007 | O/E - pustules                                 | SNOMED |
| 164356009 | O/E - pustules present                         | SNOMED |
| 395122007 | O/E - scalp rash                               | SNOMED |

|           |                                                 |                  |
|-----------|-------------------------------------------------|------------------|
| 164361006 | O/E - weals present                             | SNOMED           |
| 201220003 | Occupational acne                               | SNOMED           |
| 403351001 | Oil acne                                        | SNOMED           |
| 271763005 | Open comedone                                   | SNOMED           |
| 235049008 | Oral lichen planus                              | SNOMED           |
| 238661000 | Oral Wickham's striae in lichen planus          | SNOMED           |
| 56940005  | Palmar erythema                                 | SNOMED           |
| 271757001 | Papular eruption                                | SNOMED           |
| 239100009 | Papular eruption of blacks                      | SNOMED           |
| 397741002 | Papular eruption of chin                        | SNOMED           |
| 707248001 | Papular oral lichen planus                      | SNOMED           |
| 240560006 | Papular syphilide                               | SNOMED           |
| 200766001 | Parakeratosis                                   | SNOMED           |
| 200981004 | Parapsoriasis atrophicans                       | SNOMED           |
| 56253000  | Parapsoriasis en plaques                        | SNOMED           |
| 200982006 | Parapsoriasis herpetiformis                     | SNOMED           |
| 200984007 | Parapsoriasis papulata                          | SNOMED           |
| 200985008 | Parapsoriasis varioliformis                     | SNOMED           |
| 8.17E+15  | Parvovirus B19 infection complicating pregnancy | Nebraska Lexicon |
| 402238001 | Pebbly lichenification                          | SNOMED           |
| 277785006 | Penicillin-induced angioedema-urticaria         | SNOMED           |
| 2.48E+15  | Penile eruption                                 | Nebraska Lexicon |
| 1.08E+16  | Perianal rash                                   | Nebraska Lexicon |
| 240469009 | Perinatal varicella                             | SNOMED           |
| 276719000 | Phototherapy skin rash                          | SNOMED           |
| 238629004 | Phrynoderma                                     | SNOMED           |
| 110989007 | Pigmented peribuccal erythrosis of Brocq        | SNOMED           |
| 403352008 | Pitch acne                                      | SNOMED           |
| 238924007 | Pityriasis amiantacea                           | SNOMED           |
| 400201008 | Pityriasis capitis                              | SNOMED           |
| 200993008 | Pityriasis folliculorum                         | SNOMED           |
| 238989000 | Pityriasis rosea-like drug eruption             | SNOMED           |
| 200948000 | Pityriasis rubra                                | SNOMED           |
| 200767005 | Pityriasis simplex                              | SNOMED           |
| 778075008 | Pityriasis simplex capitis                      | SNOMED           |
| 403426003 | Pityriasis steatoides                           | SNOMED           |
| 200994002 | Pityriasis streptogenes                         | SNOMED           |

|           |                                                                                                               |        |
|-----------|---------------------------------------------------------------------------------------------------------------|--------|
| 200965009 | Plaque psoriasis                                                                                              | SNOMED |
| 403355005 | Polyporous comedone                                                                                           | SNOMED |
| 80432009  | Porokeratosis of Mibelli                                                                                      | SNOMED |
| 9031009   | Porokeratosis of Mibelli,<br>linear unilateral type                                                           | SNOMED |
| 20110000  | Porokeratosis of Mibelli,<br>plaque type                                                                      | SNOMED |
| 30005005  | Porokeratosis of Mibelli,<br>superficial disseminated type                                                    | SNOMED |
| 238649008 | Post-inflammatory<br>hyperpigmentation in lichen<br>planus                                                    | SNOMED |
| 67896006  | Post-kala-azar dermal<br>leishmaniasis                                                                        | SNOMED |
| 403325003 | Postmenopausal frontal<br>fibrosing alopecia                                                                  | SNOMED |
| 404102002 | Premycotic eruption                                                                                           | SNOMED |
| 238546005 | Pruriginous atopic dermatitis                                                                                 | SNOMED |
| 201017004 | Prurigo mitis                                                                                                 | SNOMED |
| 239103006 | Prurigo of pregnancy                                                                                          | SNOMED |
| 43118004  | Prurigo papule                                                                                                | SNOMED |
| 238589009 | Prurigo pigmentosa                                                                                            | SNOMED |
| 55608001  | Prurigo simplex                                                                                               | SNOMED |
| 42570001  | Pruritus senilis                                                                                              | SNOMED |
| 402748000 | Pseudolymphomatous<br>eruption due to drug                                                                    | SNOMED |
| 52230004  | Psoriasiform dermatitis                                                                                       | SNOMED |
| 238988008 | Psoriasiform drug eruption                                                                                    | SNOMED |
| 200962007 | Psoriasis annularis                                                                                           | SNOMED |
| 200963002 | Psoriasis circinata                                                                                           | SNOMED |
| 200964008 | Psoriasis diffusa                                                                                             | SNOMED |
| 200966005 | Psoriasis geographica                                                                                         | SNOMED |
| 200967001 | Psoriasis gyrata                                                                                              | SNOMED |
| 200968006 | Psoriasis inveterata                                                                                          | SNOMED |
| 200972005 | Psoriasis punctata                                                                                            | SNOMED |
| 200974006 | Psoriasis universalis                                                                                         | SNOMED |
| 238602009 | Psoriasis-eczema overlap<br>condition                                                                         | SNOMED |
| 239813000 | Psoriatic dactylitis                                                                                          | SNOMED |
| 724854007 | Purpura of skin and or skin-<br>associated mucous<br>membrane co-occurrent and<br>due to coagulation disorder | SNOMED |

|           |                                                                        |        |
|-----------|------------------------------------------------------------------------|--------|
| 724855008 | Purpura of skin caused by mechanical force                             | SNOMED |
| 284078000 | Purpuric rash                                                          | SNOMED |
| 59172008  | Pustular acne                                                          | SNOMED |
| 3533007   | Pustular bacterid                                                      | SNOMED |
| 200973000 | Pustular psoriasis                                                     | SNOMED |
| 238614001 | Pustular psoriasis in children                                         | SNOMED |
| 784328000 | Pustular psoriasis of palm of hand                                     | SNOMED |
| 784327005 | Pustular psoriasis of sole of foot                                     | SNOMED |
| 240562003 | Pustular syphilide                                                     | SNOMED |
| 402663007 | Pustular vasculitis                                                    | SNOMED |
| 271760008 | Pustule                                                                | SNOMED |
| 29909004  | Pyoderma faciale                                                       | SNOMED |
| 785724007 | Pyoderma gangrenosum, acne, suppurative hidradenitis syndrome          | SNOMED |
| 724015007 | Pyogenic arthritis, pyoderma gangrenosum, acne syndrome                | SNOMED |
| 827051009 | Rash due to dribbling from mouth                                       | SNOMED |
| 827052002 | Rash due to dribbling of urine                                         | SNOMED |
| 442279002 | Rash of genitalia                                                      | SNOMED |
| 1.47E+16  | Rash of groin                                                          | SNOMED |
| 827044000 | Rash of scalp                                                          | SNOMED |
| 266128007 | Rash of secondary syphilis                                             | SNOMED |
| 95332009  | Rash of systemic lupus erythematosus                                   | SNOMED |
| 238644003 | Recurrent focal palmar peeling                                         | SNOMED |
| 707249009 | Reticular oral lichen planus                                           | SNOMED |
| 402903007 | Roseola infantum                                                       | SNOMED |
| 128191000 | Rubella encephalomyelitis                                              | SNOMED |
| 1.08E+16  | Rubella in mother complicating childbirth                              | SNOMED |
| 84939004  | Rubella in mother complicating pregnancy, childbirth AND/OR puerperium | SNOMED |
| 297958004 | Rubelliform eruption                                                   | SNOMED |
| 61099007  | Rubeola scarlatinosa                                                   | SNOMED |

|           |                                                                                |        |
|-----------|--------------------------------------------------------------------------------|--------|
| 200969003 | Rupioid psoriasis                                                              | SNOMED |
| 60684003  | SAPHO syndrome                                                                 | SNOMED |
| 419735006 | Scaling eczema                                                                 | SNOMED |
| 238608008 | Scalp psoriasis                                                                | SNOMED |
| 25847004  | Seborrheic psoriasis                                                           | SNOMED |
| 402239009 | Secondary lichenification                                                      | SNOMED |
| 400051008 | Senile asteatotic eczema                                                       | SNOMED |
| 213323001 | Serum rash                                                                     | SNOMED |
| 774211005 | Severe dermatitis, multiple allergies, metabolic wasting syndrome              | SNOMED |
| 2.40E+14  | Shingles exanthem                                                              | SNOMED |
| 238654004 | Site-specific lichen planus                                                    | SNOMED |
| 420281004 | Skin rash associated with AIDS                                                 | SNOMED |
| 402177006 | Solar pruritus                                                                 | SNOMED |
| 109251008 | Solar pruritus of elbows                                                       | SNOMED |
| 444100007 | Southern tick-associated rash illness                                          | SNOMED |
| 27620007  | Spongiotic psoriasiform dermatitis                                             | SNOMED |
| 201222006 | Steroid acne                                                                   | SNOMED |
| 724833000 | Stevens-Johnson and toxic epidermal necrolysis overlap syndrome caused by drug | SNOMED |
| 768946000 | Stevens-Johnson syndrome, toxic epidermal necrolysis spectrum                  | SNOMED |
| 186357007 | Streptococcal sore throat with scarlatina                                      | SNOMED |
| 737346001 | Streptococcal toxin-mediated perineal erythema                                 | SNOMED |
| 240857007 | Strongyloidal cutaneous larva migrans                                          | SNOMED |
| 240856003 | Strongyloidal ground itch                                                      | SNOMED |
| 6048002   | Subacute generalized exfoliative dermatitis                                    | SNOMED |
| 238586002 | Subacute prurigo                                                               | SNOMED |
| 403347003 | Superficial acne vulgaris                                                      | SNOMED |
| 403348008 | Superficial inflammatory acne vulgaris                                         | SNOMED |

|           |                                                             |        |
|-----------|-------------------------------------------------------------|--------|
| 403349000 | Superficial mixed comedonal and inflammatory acne vulgaris  | SNOMED |
| 402747005 | Sweet's disease due to drug                                 | SNOMED |
| 238392009 | Sycosis cruris                                              | SNOMED |
| 403623004 | T-cell pseudolymphoma due to drug                           | SNOMED |
| 402744003 | Toxic epidermal necrolysis due to drug                      | SNOMED |
| 402359006 | Toxic epidermal necrolysis due to graft-versus-host disease | SNOMED |
| 768961004 | Toxic epidermal necrolysis due to infection                 | SNOMED |
| 238816001 | Toxic urticated erythema                                    | SNOMED |
| 403606008 | Toxic urticated erythema due to drug                        | SNOMED |
| 312106007 | Toxocara larva migrans of skin                              | SNOMED |
| 41156006  | Tuberculosis papulonecrotica                                | SNOMED |
| 238657006 | Ulcerative lichen planus of palms and soles                 | SNOMED |
| 51057008  | Ulerythema of cheeks                                        | SNOMED |
| 400126005 | Ulerythema ophryogenes                                      | SNOMED |
| 238601002 | Unstable psoriasis                                          | SNOMED |
| 733110004 | Van den Bosch syndrome                                      | SNOMED |
| 79893008  | Vesicular eruption                                          | SNOMED |
| 277171005 | Vesicular eruption in ear canal                             | SNOMED |
| 95328003  | Vesicular skin eruptions of the temporal region             | SNOMED |
| 28414003  | Vitamin A deficiency with xeroderma                         | SNOMED |
| 707250009 | Vulvovaginal gingival syndrome                              | SNOMED |
| 247472004 | Weal                                                        | SNOMED |
| 238651007 | Wickham's striae in lichen planus                           | SNOMED |
| 201025002 | Winter itch                                                 | SNOMED |
| 700298002 | Xeroderma of lower eyelid                                   | SNOMED |
| 700346002 | Xeroderma of upper eyelid                                   | SNOMED |
| 238648000 | Zosteriform lichen planus                                   | SNOMED |

## Alopecia

| Code      | Name                                                                              | Vocabulary |
|-----------|-----------------------------------------------------------------------------------|------------|
| 238725004 | Non-scarring alopecia                                                             | SNOMED     |
| 68225006  | Alopecia areata                                                                   | SNOMED     |
| 56317004  | Alopecia                                                                          | SNOMED     |
| 87872006  | Male pattern alopecia                                                             | SNOMED     |
| 400088006 | Scarring alopecia                                                                 | SNOMED     |
| 86166000  | Alopecia universalis                                                              | SNOMED     |
| 19754005  | Alopecia totalis                                                                  | SNOMED     |
| 27382006  | Alopecia mucinosa                                                                 | SNOMED     |
| 5860009   | Ophiasis                                                                          | SNOMED     |
| 2965006   | Congenital alopecia                                                               | SNOMED     |
| 201146008 | Drug-induced androgenic alopecia                                                  | SNOMED     |
| 238731001 | Pseudopelade                                                                      | SNOMED     |
| 59307008  | Syphilitic alopecia                                                               | SNOMED     |
| 723005006 | Acute telogen effluvium                                                           | SNOMED     |
| 720981000 | Alopecia and intellectual disability with hypergonadotropic hypogonadism syndrome | SNOMED     |
| 783205005 | Alopecia antibody deficiency                                                      | SNOMED     |
| 402637002 | Alopecia due to disturbance of hair cycle                                         | SNOMED     |
| 402639004 | Alopecia due to friction and trauma                                               | SNOMED     |
| 402638007 | Alopecia due to underlying disease                                                | SNOMED     |
| 201136006 | Alopecia febrilis                                                                 | SNOMED     |
| 201140002 | Alopecia follicularis                                                             | SNOMED     |
| 201144006 | Alopecia hereditaria                                                              | SNOMED     |
| 111024006 | Alopecia liminaris frontalis                                                      | SNOMED     |
| 201137002 | Alopecia localis                                                                  | SNOMED     |
| 201141003 | Alopecia neurotica                                                                | SNOMED     |
| 201134009 | Alopecia of pregnancy                                                             | SNOMED     |
| 238729005 | Alopecia parvimaclata                                                             | SNOMED     |
| 201143000 | Alopecia seborrheica                                                              | SNOMED     |
| 201135005 | Alopecia senilis                                                                  | SNOMED     |
| 788417006 | Alopecia, epilepsy, intellectual disability syndrome Moynahan type                | SNOMED     |



|           |                                                                                        |        |
|-----------|----------------------------------------------------------------------------------------|--------|
| 770941005 | Alopecia, progressive neurological defect, endocrinopathy syndrome                     | SNOMED |
| 720980004 | Alopecia, psychomotor epilepsy, periodontal pyorrhea, intellectual disability syndrome | SNOMED |
| 403318005 | Androgenetic alopecia in association with polycystic ovaries                           | SNOMED |
| 403798006 | Atrichia congenita                                                                     | SNOMED |
| 715963002 | Atrichia with papular lesions                                                          | SNOMED |
| 719518004 | Autosomal dominant palmoplantar keratoderma and congenital alopecia                    | SNOMED |
| 719104003 | Autosomal recessive palmoplantar keratoderma and congenital alopecia syndrome          | SNOMED |
| 403334008 | Brush alopecia                                                                         | SNOMED |
| 403332007 | Brush roller alopecia                                                                  | SNOMED |
| 201139004 | Cachectic alopecia                                                                     | SNOMED |
| 1.09E+14  | Central centrifugal cicatricial alopecia                                               | SNOMED |
| 720850008 | Choroidal atrophy and alopecia syndrome                                                | SNOMED |
| 403335009 | Chronic diffuse alopecia                                                               | SNOMED |
| 403328001 | Chronic telogen effluvium                                                              | SNOMED |
| 403727008 | Cicatricial alopecia due to ionizing radiation                                         | SNOMED |
| 402350005 | Cicatricial alopecia due to lichen planus                                              | SNOMED |
| 403322000 | Circumscribed alopecia areata of beard area                                            | SNOMED |
| 403321007 | Circumscribed alopecia areata of eyelashes/eyebrows                                    | SNOMED |
| 403323005 | Circumscribed alopecia areata of limbs                                                 | SNOMED |
| 403320008 | Circumscribed alopecia areata of scalp                                                 | SNOMED |
| 403324004 | Circumscribed alopecia areata of trunk                                                 | SNOMED |

|           |                                                                             |        |
|-----------|-----------------------------------------------------------------------------|--------|
| 77363004  | Concentric alopecia areata                                                  | SNOMED |
| 63935007  | Congenital absence of eyelash                                               | SNOMED |
| 254225000 | Congenital alopecia with keratin cysts                                      | SNOMED |
| 268288009 | Congenital generalized alopecia                                             | SNOMED |
| 205592008 | Congenital localized alopecia                                               | SNOMED |
| 201138007 | Diffuse alopecia                                                            | SNOMED |
| 46586006  | Diffuse alopecia areata                                                     | SNOMED |
| 73383004  | Drug-related alopecia                                                       | SNOMED |
| 771335004 | Ectodermal dysplasia syndactyly syndrome                                    | SNOMED |
| 54539003  | Endocrine alopecia                                                          | SNOMED |
| 1108009   | Female pattern alopecia                                                     | SNOMED |
| 716088000 | Follicular hamartoma with alopecia and cystic fibrosis syndrome             | SNOMED |
| 238469005 | Friction alopecia                                                           | SNOMED |
| 201132008 | Frontal alopecia of women                                                   | SNOMED |
| 717055000 | Frontal fibrosing alopecia                                                  | SNOMED |
| 725029001 | Frontonasal dysplasia with alopecia and genital anomaly syndrome            | SNOMED |
| 31082002  | Frostbite alopecia                                                          | SNOMED |
| 722451006 | Gomez Lopez Hernandez syndrome                                              | SNOMED |
| 721842008 | Hypogonadotropic hypogonadism with frontoparietal alopecia syndrome         | SNOMED |
| 763404001 | Ichthyosis, alopecia, eclabion, ectropion, intellectual disability syndrome | SNOMED |
| 238728002 | Involutional alopecia                                                       | SNOMED |
| 238923001 | Lipedematous alopecia                                                       | SNOMED |
| 283872008 | Loss of outer third of eyebrow                                              | SNOMED |
| 403331000 | Marginal alopecia                                                           | SNOMED |
| 403330004 | Massage alopecia                                                            | SNOMED |
| 65130004  | Nutritional alopecia                                                        | SNOMED |
| 275950000 | O/E - alopecia                                                              | SNOMED |
| 268921005 | O/E - patches of alopecia                                                   | SNOMED |

|           |                                                                              |        |
|-----------|------------------------------------------------------------------------------|--------|
| 763828007 | Odonto onycho dysplasia with alopecia syndrome                               | SNOMED |
| 239019002 | Odonto-onychia dysplasia with alopecia                                       | SNOMED |
| 247541001 | Partial loss of hair                                                         | SNOMED |
| 716191002 | Perniola Krajewska Carnevale syndrome                                        | SNOMED |
| 201142005 | Peroneal alopecia                                                            | SNOMED |
| 771186004 | Poikiloderma, alopecia, retrognathism, cleft palate syndrome                 | SNOMED |
| 59817009  | Postinfectional hypotrichosis                                                | SNOMED |
| 403319002 | Postmenopausal androgenetic alopecia                                         | SNOMED |
| 403325003 | Postmenopausal frontal fibrosing alopecia                                    | SNOMED |
| 87038002  | Postpartum alopecia                                                          | SNOMED |
| 201133003 | Premature alopecia                                                           | SNOMED |
| 719275009 | Primary hypergonadotropic hypogonadism and partial alopecia syndrome         | SNOMED |
| 733086003 | Pseudoprogeria syndrome                                                      | SNOMED |
| 22934003  | Radiation alopecia                                                           | SNOMED |
| 763630007 | Satoyoshi syndrome                                                           | SNOMED |
| 733204008 | Scarring alopecia due to traumatic injury                                    | SNOMED |
| 722002002 | Scholte syndrome                                                             | SNOMED |
| 720345008 | Severe T-cell immunodeficiency, congenital alopecia, nail dystrophy syndrome | SNOMED |
| 403329009 | Short anagen syndrome                                                        | SNOMED |
| 721075001 | Short tarsus with absence of lower eyelashes syndrome                        | SNOMED |
| 403534007 | Sutural alopecia                                                             | SNOMED |
| 67772009  | Thermal burn alopecia                                                        | SNOMED |
| 771182002 | Thumb deformity, alopecia, pigmentation anomaly syndrome                     | SNOMED |
| 67488005  | Traumatic alopecia                                                           | SNOMED |
| 403535008 | Triangular alopecia                                                          | SNOMED |
| 238732008 | Tufted folliculitis                                                          | SNOMED |
| 403533001 | Vertical alopecia                                                            | SNOMED |

|           |                           |        |
|-----------|---------------------------|--------|
| 816067005 | Woodhouse Sakati syndrome | SNOMED |
|-----------|---------------------------|--------|

#### Altered Smell or Taste

| Code      | Name                                            | Domain    |
|-----------|-------------------------------------------------|-----------|
| 2.61E+12  | Sensory disorder of smell and/or taste          | Condition |
| 44169009  | Loss of sense of smell                          | Condition |
| 271801002 | Taste sense altered                             | Condition |
| 708673009 | Parosmia                                        | Condition |
| 699656000 | Radiation induced taste impairment              | Condition |
| 699220008 | Phantom taste                                   | Condition |
| 722027009 | Kallman syndrome with heart disease             | Condition |
| 771147003 | Isolated arhinencephaly                         | Condition |
| 37481009  | Anterior tongue taste disorder                  | Condition |
| 36905001  | Secondary bitter taste disorder                 | Condition |
| 66073004  | Glossopharyngeal taste disorder                 | Condition |
| 399993004 | Disorder of taste                               | Condition |
| 93559003  | Hypogonadism with anosmia                       | Condition |
| 67724008  | Secondary salt taste disorder                   | Condition |
| 348083004 | Primary taste disorder                          | Condition |
| 40307005  | Primary acid taste disorder                     | Condition |
| 41783004  | Traumatic anosmia                               | Condition |
| 47339000  | Secondary sweet taste disorder                  | Condition |
| 275462005 | Disorder of smell                               | Condition |
| 272028008 | C/O - anosmia                                   | Condition |
| 34680005  | Primary sweet taste disorder                    | Condition |
| 247318005 | Abnormal taste in mouth                         | Condition |
| 164055003 | On examination - taste loss anterior 2/3 tongue | Condition |
| 20801005  | Secondary acid taste disorder                   | Condition |
| 15732002  | Secondary taste disorder                        | Condition |
| 230502003 | Congenital anosmia                              | Condition |
| 12869004  | Primary salt taste disorder                     | Condition |
| 112107000 | Primary bitter taste disorder                   | Condition |

## Anxiety

| Code      | Name                                                                          | Vocabulary |
|-----------|-------------------------------------------------------------------------------|------------|
| 21897009  | Generalized anxiety disorder                                                  | SNOMED     |
| 197480006 | Anxiety disorder                                                              | SNOMED     |
| 47505003  | Posttraumatic stress disorder                                                 | SNOMED     |
| 56576003  | Panic disorder without agoraphobia                                            | SNOMED     |
| 25501002  | Social phobia                                                                 | SNOMED     |
| 191736004 | Obsessive-compulsive disorder                                                 | SNOMED     |
| 11806006  | Separation anxiety disorder of childhood                                      | SNOMED     |
| 35607004  | Panic disorder with agoraphobia                                               | SNOMED     |
| 67195008  | Acute stress disorder                                                         | SNOMED     |
| 62351001  | Generalized social phobia                                                     | SNOMED     |
| 17496003  | Organic anxiety disorder                                                      | SNOMED     |
| 109006    | Anxiety disorder of childhood OR adolescence                                  | SNOMED     |
| 386810004 | Phobic disorder                                                               | SNOMED     |
| 313182004 | Chronic post-traumatic stress disorder                                        | SNOMED     |
| 50026000  | Psychoactive substance-induced organic anxiety disorder                       | SNOMED     |
| 82415003  | Agoraphobia without history of panic disorder without limited symptom attacks | SNOMED     |
| 70691001  | Agoraphobia                                                                   | SNOMED     |
| 61569007  | Agoraphobia without history of panic disorder                                 | SNOMED     |
| 192042008 | Acute post-trauma stress state                                                | SNOMED     |
| 34938008  | Alcohol-induced anxiety disorder                                              | SNOMED     |
| 83253003  | Shyness disorder of childhood                                                 | SNOMED     |
| 1686006   | Sedative, hypnotic AND/OR anxiolytic-induced anxiety disorder                 | SNOMED     |
| 51493001  | Cocaine-induced anxiety disorder                                              | SNOMED     |
| 58535001  | Physical AND emotional exhaustion state                                       | SNOMED     |
| 192038005 | Acute fugue state due to acute stress reaction                                | SNOMED     |
| 192037000 | Acute panic state due to acute stress reaction                                | SNOMED     |
| 446175003 | Acute posttraumatic stress disorder following military combat                 | SNOMED     |

|           |                                                                            |                  |
|-----------|----------------------------------------------------------------------------|------------------|
| 192041001 | Acute situational disturbance                                              | SNOMED           |
| 192039002 | Acute stupor state due to acute stress reaction                            | SNOMED           |
| 191722009 | Agoraphobia with panic attacks                                             | SNOMED           |
| 1380006   | Agoraphobia without history of panic disorder with limited symptom attacks | SNOMED           |
| 82339009  | Amphetamine-induced anxiety disorder                                       | SNOMED           |
| 724722007 | Anxiety disorder caused by dissociative drug                               | SNOMED           |
| 2.26E+13  | Anxiety disorder caused by drug                                            | SNOMED           |
| 724723002 | Anxiety disorder caused by ketamine                                        | SNOMED           |
| 1.24E+16  | Anxiety disorder caused by methamphetamine                                 | SNOMED           |
| 724708007 | Anxiety disorder caused by methylenedioxymethamphetamine                   | SNOMED           |
| 724654009 | Anxiety disorder caused by opioid                                          | SNOMED           |
| 762331007 | Anxiety disorder caused by stimulant                                       | SNOMED           |
| 737341006 | Anxiety disorder caused by synthetic cannabinoid                           | SNOMED           |
| 762515000 | Anxiety disorder caused by synthetic cathinone                             | SNOMED           |
| 52910006  | Anxiety disorder due to a general medical condition                        | SNOMED           |
| 9.97E+15  | Anxiety disorder due to brain injury                                       | Nebraska Lexicon |
| 1.07E+16  | Anxiety disorder in mother complicating childbirth                         | SNOMED           |
| 37868008  | Anxiety disorder of adolescence                                            | SNOMED           |
| 53467004  | Anxiety disorder of childhood                                              | SNOMED           |
| 69479009  | Anxiety hyperventilation                                                   | SNOMED           |
| 90790003  | Avoidant disorder of adolescence                                           | SNOMED           |
| 64165008  | Avoidant disorder of childhood                                             | SNOMED           |
| 37872007  | Avoidant disorder of childhood OR adolescence                              | SNOMED           |
| 238976006 | Bromisodrophobia                                                           | SNOMED           |
| 192611004 | Childhood phobic anxiety disorder                                          | SNOMED           |
| 699241002 | Chronic post-traumatic stress disorder following military combat           | SNOMED           |
| 426174008 | Chronic stress disorder                                                    | SNOMED           |

|           |                                                                             |        |
|-----------|-----------------------------------------------------------------------------|--------|
| 61157009  | Combat fatigue                                                              | SNOMED |
| 443919007 | Complex posttraumatic stress disorder                                       | SNOMED |
| 191737008 | Compulsive neurosis                                                         | SNOMED |
| 446180007 | Delayed posttraumatic stress disorder following military combat             | SNOMED |
| 111487009 | Dream anxiety disorder                                                      | SNOMED |
| 1.63E+16  | Mild major depressive disorder co-occurrent with anxiety single episode     | SNOMED |
| 231504006 | Mixed anxiety and depressive disorder                                       | SNOMED |
| 1.63E+16  | Moderate major depressive disorder co-occurrent with anxiety single episode | SNOMED |
| 428687006 | Nightmares associated with chronic post-traumatic stress disorder           | SNOMED |
| 191738003 | Obsessional neurosis                                                        | SNOMED |
| 724693000 | Obsessive compulsive disorder caused by cocaine                             | SNOMED |
| 724730008 | Obsessive compulsive disorder caused by psychoactive substance              | SNOMED |
| 762332000 | Obsessive compulsive disorder caused by stimulant                           | SNOMED |
| 762516004 | Obsessive compulsive disorder caused by synthetic cathinone                 | SNOMED |
| 10586006  | Occupation-related stress disorder                                          | SNOMED |
| 723913009 | Olfactory reference disorder                                                | SNOMED |
| 13438001  | Overanxious disorder of childhood                                           | SNOMED |
| 371631005 | Panic disorder                                                              | SNOMED |
| 89948007  | Panic disorder with agoraphobia AND mild panic attacks                      | SNOMED |
| 8185002   | Panic disorder with agoraphobia AND moderate panic attacks                  | SNOMED |
| 59923000  | Panic disorder with agoraphobia AND panic attacks in full remission         | SNOMED |
| 63909006  | Panic disorder with agoraphobia AND panic attacks in partial remission      | SNOMED |
| 5509004   | Panic disorder with agoraphobia AND severe panic attacks                    | SNOMED |

|           |                                                                                                                    |        |
|-----------|--------------------------------------------------------------------------------------------------------------------|--------|
| 76868007  | Panic disorder with agoraphobia, agoraphobic avoidance in full remission AND mild panic attacks                    | SNOMED |
| 87798009  | Panic disorder with agoraphobia, agoraphobic avoidance in full remission AND moderate panic attacks                | SNOMED |
| 11941006  | Panic disorder with agoraphobia, agoraphobic avoidance in full remission AND panic attacks in full remission       | SNOMED |
| 111491004 | Panic disorder with agoraphobia, agoraphobic avoidance in full remission AND panic attacks in partial remission    | SNOMED |
| 34116005  | Panic disorder with agoraphobia, agoraphobic avoidance in full remission AND severe panic attacks                  | SNOMED |
| 31781004  | Panic disorder with agoraphobia, agoraphobic avoidance in partial remission AND mild panic attacks                 | SNOMED |
| 32388005  | Panic disorder with agoraphobia, agoraphobic avoidance in partial remission AND moderate panic attacks             | SNOMED |
| 22230001  | Panic disorder with agoraphobia, agoraphobic avoidance in partial remission AND panic attacks in full remission    | SNOMED |
| 3158007   | Panic disorder with agoraphobia, agoraphobic avoidance in partial remission AND panic attacks in partial remission | SNOMED |
| 111490003 | Panic disorder with agoraphobia, agoraphobic avoidance in partial remission AND severe panic attacks               | SNOMED |
| 63701002  | Panic disorder with agoraphobia, mild agoraphobic avoidance AND mild panic attacks                                 | SNOMED |



|          |                                                                                                        |        |
|----------|--------------------------------------------------------------------------------------------------------|--------|
| 49564006 | Panic disorder with agoraphobia, mild agoraphobic avoidance AND moderate panic attacks                 | SNOMED |
| 24781009 | Panic disorder with agoraphobia, mild agoraphobic avoidance AND panic attacks in full remission        | SNOMED |
| 50983008 | Panic disorder with agoraphobia, mild agoraphobic avoidance AND panic attacks in partial remission     | SNOMED |
| 19766004 | Panic disorder with agoraphobia, mild agoraphobic avoidance AND severe panic attacks                   | SNOMED |
| 4932002  | Panic disorder with agoraphobia, moderate agoraphobic avoidance AND mild panic attacks                 | SNOMED |
| 82738004 | Panic disorder with agoraphobia, moderate agoraphobic avoidance AND moderate panic attacks             | SNOMED |
| 64060000 | Panic disorder with agoraphobia, moderate agoraphobic avoidance AND panic attacks in full remission    | SNOMED |
| 76812003 | Panic disorder with agoraphobia, moderate agoraphobic avoidance AND panic attacks in partial remission | SNOMED |
| 83631006 | Panic disorder with agoraphobia, moderate agoraphobic avoidance AND severe panic attacks               | SNOMED |
| 1816003  | Panic disorder with agoraphobia, severe agoraphobic avoidance AND mild panic attacks                   | SNOMED |
| 30059008 | Panic disorder with agoraphobia, severe agoraphobic avoidance AND moderate panic attacks               | SNOMED |
| 38328002 | Panic disorder with agoraphobia, severe agoraphobic avoidance AND panic attacks in full remission      | SNOMED |
| 74010007 | Panic disorder with agoraphobia, severe agoraphobic avoidance AND panic attacks in partial remission   | SNOMED |

|           |                                                                                        |        |
|-----------|----------------------------------------------------------------------------------------|--------|
| 61212007  | Panic disorder with agoraphobia, severe agoraphobic avoidance AND severe panic attacks | SNOMED |
| 72861004  | Panic disorder without agoraphobia with mild panic attacks                             | SNOMED |
| 65064003  | Panic disorder without agoraphobia with moderate panic attacks                         | SNOMED |
| 82494000  | Panic disorder without agoraphobia with panic attacks in full remission                | SNOMED |
| 53956006  | Panic disorder without agoraphobia with panic attacks in partial remission             | SNOMED |
| 43150009  | Panic disorder without agoraphobia with severe panic attacks                           | SNOMED |
| 2.48E+14  | Paruresis                                                                              | SNOMED |
| 55967005  | Phencyclidine-induced anxiety disorder                                                 | SNOMED |
| 403593004 | Phobic fear of skin cancer                                                             | SNOMED |
| 318784009 | Posttraumatic stress disorder, delayed onset                                           | SNOMED |
| 192014006 | Psychogenic rumination                                                                 | SNOMED |
| 1.63E+16  | Recurrent major depressive disorder co-occurrent with anxiety in full remission        | SNOMED |
| 1.63E+16  | Recurrent major depressive disorder in partial remission co-occurrent with anxiety     | SNOMED |
| 1.63E+16  | Recurrent mild major depressive disorder co-occurrent with anxiety                     | SNOMED |
| 1.63E+16  | Recurrent moderate major depressive disorder co-occurrent with anxiety                 | SNOMED |
| 1.63E+16  | Recurrent severe major depressive disorder co-occurrent with anxiety                   | SNOMED |
| 126943008 | Separation anxiety                                                                     | SNOMED |
| 85061001  | Separation anxiety disorder of childhood, early onset                                  | SNOMED |

|           |                                                                           |                  |
|-----------|---------------------------------------------------------------------------|------------------|
| 1.63E+16  | Severe major depressive disorder co-occurrent with anxiety single episode | SNOMED           |
| 279611005 | Shell shock                                                               | SNOMED           |
| 54587008  | Simple phobia                                                             | SNOMED           |
| 2.12E+16  | Situational anxiety                                                       | Nebraska Lexicon |
| 191724005 | Social phobia, fear of eating in public                                   | SNOMED           |
| 191725006 | Social phobia, fear of public speaking                                    | SNOMED           |
| 191726007 | Social phobia, fear of public washing                                     | SNOMED           |
| 317816007 | Stockholm syndrome                                                        | SNOMED           |
| 3.52E+14  | Stranger anxiety                                                          | SNOMED           |
| 192044009 | Stress reaction causing mixed disturbance of emotion and conduct          | SNOMED           |
| 238966008 | Syphilophobia                                                             | SNOMED           |
| 238965007 | Venereophobia                                                             | SNOMED           |

## Chest Pain

| Code      | Name                                                              | Vocabulary |
|-----------|-------------------------------------------------------------------|------------|
| 29857009  | Chest pain                                                        | SNOMED     |
| 194828000 | Angina pectoris                                                   | SNOMED     |
| 4557003   | Preinfarction syndrome                                            | SNOMED     |
| 71884009  | Precordial pain                                                   | SNOMED     |
| 16331000  | Heartburn                                                         | SNOMED     |
| 1.60E+16  | Angina co-occurrent and due to coronary arteriosclerosis          | SNOMED     |
| 2237002   | Pleuritic pain                                                    | SNOMED     |
| 1.60E+16  | Unstable angina co-occurrent and due to coronary arteriosclerosis | SNOMED     |
| 274664007 | Chest pain on breathing                                           | SNOMED     |
| 239175003 | Post-thoracotomy pain syndrome                                    | SNOMED     |
| 87343002  | Prinzmetal angina                                                 | SNOMED     |
| 59021001  | Angina decubitus                                                  | SNOMED     |
| 735940001 | Pain of intercostal space                                         | SNOMED     |
| 83264000  | Epidemic pleurodynia                                              | SNOMED     |

|           |                                                                                  |                  |
|-----------|----------------------------------------------------------------------------------|------------------|
| 314116003 | Post infarct angina                                                              | SNOMED           |
| 102587001 | Acute chest pain                                                                 | SNOMED           |
| 194823009 | Acute coronary insufficiency                                                     | SNOMED           |
| 7.91E+11  | Angina associated with type 2 diabetes mellitus                                  | SNOMED           |
| 1.60E+16  | Angina co-occurrent and due to arteriosclerosis of coronary artery bypass graft  | SNOMED           |
| 61490001  | Angina, class I                                                                  | SNOMED           |
| 41334000  | Angina, class II                                                                 | SNOMED           |
| 85284003  | Angina, class III                                                                | SNOMED           |
| 89323001  | Angina, class IV                                                                 | SNOMED           |
| 161973001 | Anterior chest wall pain                                                         | SNOMED           |
| 7.92E+12  | Anterior pleuritic pain                                                          | SNOMED           |
| 1.60E+16  | Arteriosclerosis of autologous arterial coronary artery bypass graft with angina | SNOMED           |
| 1.60E+16  | Arteriosclerosis of autologous vein coronary artery bypass graft with angina     | SNOMED           |
| 371807002 | Atypical angina                                                                  | SNOMED           |
| 102589003 | Atypical chest pain                                                              | SNOMED           |
| 1.57E+16  | Bilateral pain of shoulder blades                                                | SNOMED           |
| 426396005 | Cardiac chest pain                                                               | SNOMED           |
| 233845001 | Cardiac syndrome X                                                               | SNOMED           |
| 161972006 | Central chest pain                                                               | SNOMED           |
| 279019008 | Central crushing chest pain                                                      | SNOMED           |
| 9267009   | Chest pain at rest                                                               | SNOMED           |
| 3.48E+13  | Chest pain due to pericarditis                                                   | SNOMED           |
| 81953000  | Chest pain on exertion                                                           | SNOMED           |
| 7.46E+15  | Chest pain rule out myocardial infarction                                        | Nebraska Lexicon |
| 102588006 | Chest wall pain                                                                  | SNOMED           |
| 102591006 | Chest wall tenderness                                                            | SNOMED           |
| 4.34E+14  | Chronic chest pain                                                               | SNOMED           |
| 7.58E+15  | Costal chondral thoracic pain                                                    | Nebraska Lexicon |
| 161977000 | Costal margin chest pain                                                         | SNOMED           |
| 59139008  | Crushing chest pain                                                              | SNOMED           |
| 3368006   | Dull chest pain                                                                  | SNOMED           |
| 36859004  | Esophageal chest pain                                                            | SNOMED           |

|           |                                                         |        |
|-----------|---------------------------------------------------------|--------|
| 300995000 | Exercise-induced angina                                 | SNOMED |
| 722876002 | Functional heartburn                                    | SNOMED |
| 95421005  | Intercostal myalgia                                     | SNOMED |
| 247389006 | Intercostal neuralgia                                   | SNOMED |
| 713839007 | Intercostal neuralgia as late effect of trauma          | SNOMED |
| 230597003 | Intercostal post-herpetic neuralgia                     | SNOMED |
| 279048002 | Internal mammary artery syndrome                        | SNOMED |
| 225566008 | Ischemic chest pain                                     | SNOMED |
| 285385002 | Left sided chest pain                                   | SNOMED |
| 9.70E+13  | Localized chest pain                                    | SNOMED |
| 281245003 | Musculoskeletal chest pain                              | SNOMED |
| 279036000 | Myofascial pain syndrome of thorax                      | SNOMED |
| 233821000 | New onset angina                                        | SNOMED |
| 35928006  | Nocturnal angina                                        | SNOMED |
| 274668005 | Non-cardiac chest pain                                  | SNOMED |
| 1.57E+16  | Pain of bilateral sternoclavicular joints               | SNOMED |
| 774135008 | Pain of left shoulder blade                             | SNOMED |
| 1.08E+15  | Pain of left sternoclavicular joint                     | SNOMED |
| 774134007 | Pain of right shoulder blade                            | SNOMED |
| 1.08E+15  | Pain of right sternoclavicular joint                    | SNOMED |
| 298731003 | Pain of sternum                                         | SNOMED |
| 161974007 | Parasternal pain                                        | SNOMED |
| 13057000  | Pleuropericardial chest pain                            | SNOMED |
| 713829001 | Postinfective intercostal neuralgia                     | SNOMED |
| 371806006 | Progressive angina                                      | SNOMED |
| 10000006  | Radiating chest pain                                    | SNOMED |
| 371810009 | Recurrent angina after coronary artery bypass graft     | SNOMED |
| 371809004 | Recurrent angina after coronary stent placement         | SNOMED |
| 371812001 | Recurrent angina after directional coronary atherectomy | SNOMED |

|           |                                                                                          |                  |
|-----------|------------------------------------------------------------------------------------------|------------------|
| 371808007 | Recurrent angina after percutaneous transluminal coronary angioplasty                    | SNOMED           |
| 371811008 | Recurrent angina post rotational atherectomy                                             | SNOMED           |
| 315025001 | Refractory angina                                                                        | SNOMED           |
| 4568003   | Retrosternal pain                                                                        | SNOMED           |
| 297217002 | Rib pain                                                                                 | SNOMED           |
| 298740004 | Rib tender                                                                               | SNOMED           |
| 285386001 | Right sided chest pain                                                                   | SNOMED           |
| 20793008  | Scapalgia                                                                                | SNOMED           |
| 5.38E+15  | Spasmodic midsternal pain                                                                | Nebraska Lexicon |
| 371030007 | Squeezing chest pain                                                                     | SNOMED           |
| 233819005 | Stable angina                                                                            | SNOMED           |
| 1.68E+16  | Stable angina due to coronary arteriosclerosis                                           | SNOMED           |
| 19057007  | Status anginosus                                                                         | SNOMED           |
| 202478007 | Sternoclavicular joint pain                                                              | SNOMED           |
| 21470009  | Syncope anginosa                                                                         | SNOMED           |
| 103015000 | Thoracic nerve root pain                                                                 | SNOMED           |
| 429559004 | Typical angina                                                                           | SNOMED           |
| 1.60E+16  | Unstable angina co-occurrent and due to arteriosclerosis of coronary artery bypass graft | SNOMED           |
| 1.60E+16  | Unstable angina due to arteriosclerosis of autologous vein coronary artery bypass graft  | SNOMED           |
| 285389008 | Upper chest pain                                                                         | SNOMED           |
| 89638008  | Xiphodynia                                                                               | SNOMED           |
| 89874002  | Xiphoidalga syndrome                                                                     | SNOMED           |

## Cough

| Code      | Name                        | Vocabulary |
|-----------|-----------------------------|------------|
| 49727002  | Cough                       | SNOMED     |
| 274708000 | Abnormal sputum             | SNOMED     |
| 8.11E+14  | [D]Episodic dry cough       | SNOMED     |
| 289113002 | Able to cough               | SNOMED     |
| 225576006 | Able to cough up sputum     | SNOMED     |
| 306780002 | Able to cough voluntarily   | SNOMED     |
| 275787002 | Acid-fast bacilli in sputum | SNOMED     |
| 300959008 | Allergic cough              | SNOMED     |

|           |                                  |                  |
|-----------|----------------------------------|------------------|
| 17986004  | Barking cough                    | SNOMED           |
| 274399004 | Blood in sputum O/E              | SNOMED           |
| 6686005   | Blood streaked sputum            | SNOMED           |
| 61281005  | Bloodstained sputum              | SNOMED           |
| 62427007  | Bovine cough                     | SNOMED           |
| 20670007  | Brassy cough                     | SNOMED           |
| 2.05E+14  | Bronchial casts                  | SNOMED           |
| 277910004 | Brown sputum                     | SNOMED           |
| 272039006 | C/O - cough                      | SNOMED           |
| 68154008  | Chronic cough                    | SNOMED           |
| 248604008 | Clear sputum                     | SNOMED           |
| 248589007 | Clearing throat - hawking        | SNOMED           |
| 365445003 | Color of sputum - finding        | SNOMED           |
| 365444004 | Consistency of sputum - finding  | SNOMED           |
| 248599002 | Copious sputum                   | SNOMED           |
| 46789001  | Cough after eating               | SNOMED           |
| 7142008   | Cough at rest                    | SNOMED           |
| 1.27E+16  | Cough due to ACE inhibitor       | Nebraska Lexicon |
| 19282004  | Cough on exercise                | SNOMED           |
| 123819004 | Cough reflex absent              | SNOMED           |
| 102580004 | Cough suppression                | SNOMED           |
| 248593001 | Cough when swallowing            | SNOMED           |
| 135883003 | Cough with fever                 | SNOMED           |
| 276314008 | Coughing ineffective             | SNOMED           |
| 277906002 | Creamy sputum                    | SNOMED           |
| 289965001 | Croupy cough                     | SNOMED           |
| 8.61E+14  | Dark green sputum                | SNOMED           |
| 52673003  | Decreased coughing               | SNOMED           |
| 289116005 | Difficulty coughing              | SNOMED           |
| 306782005 | Difficulty coughing voluntarily  | SNOMED           |
| 301245004 | Difficulty in coughing up sputum | SNOMED           |
| 248605009 | Dirty sputum                     | SNOMED           |
| 289114008 | Does cough                       | SNOMED           |
| 301246003 | Does cough up sputum             | SNOMED           |
| 289115009 | Does not cough                   | SNOMED           |
| 301247007 | Does not cough up sputum         | SNOMED           |
| 11833005  | Dry cough                        | SNOMED           |
| 62618004  | Early morning cough              | SNOMED           |
| 301236000 | Effective cough                  | SNOMED           |

|           |                                                 |                  |
|-----------|-------------------------------------------------|------------------|
| 161933007 | Evening cough                                   | SNOMED           |
| 111987004 | Expectoration of currant jelly sputum           | SNOMED           |
| 301293005 | Finding of odor of sputum                       | SNOMED           |
| 366124008 | Finding related to ability to cough             | SNOMED           |
| 366126005 | Finding related to ability to cough up sputum   | SNOMED           |
| 366125009 | Finding related to ability to cough voluntarily | SNOMED           |
| 43516009  | Foul smelling sputum                            | SNOMED           |
| 301290008 | Frank blood in sputum                           | SNOMED           |
| 68423001  | Frothy sputum                                   | SNOMED           |
| 277900008 | Gray sputum                                     | SNOMED           |
| 277908001 | Green sputum                                    | SNOMED           |
| 59994004  | Hacking cough                                   | SNOMED           |
| 2.48E+16  | Increased sputum production                     | Nebraska Lexicon |
| 62731002  | Increasing frequency of cough                   | SNOMED           |
| 248600004 | Moderate sputum                                 | SNOMED           |
| 161932002 | Morning cough                                   | SNOMED           |
| 64503007  | Mucoid sputum                                   | SNOMED           |
| 275718000 | Mucoid sputum - O/E                             | SNOMED           |
| 8955008   | Mucopurulent sputum                             | SNOMED           |
| 769211009 | No cough strength                               | SNOMED           |
| 248602007 | No sputum                                       | SNOMED           |
| 62548007  | Nocturnal cough                                 | SNOMED           |
| 161947006 | Nocturnal cough / wheeze                        | SNOMED           |
| 309651002 | O/E - sputum                                    | SNOMED           |
| 247410004 | Painful cough                                   | SNOMED           |
| 8.61E+14  | Pale green sputum                               | SNOMED           |
| 43025008  | Paroxysmal cough                                | SNOMED           |
| 284523002 | Persistent cough                                | SNOMED           |
| 301289004 | Pluggy sputum                                   | SNOMED           |
| 111962006 | Postural cough                                  | SNOMED           |
| 445241004 | Postviral cough                                 | SNOMED           |
| 28743005  | Productive cough                                | SNOMED           |
| 161923004 | Productive cough -clear sputum                  | SNOMED           |
| 161924005 | Productive cough -green sputum                  | SNOMED           |
| 161925006 | Productive cough-yellow sputum                  | SNOMED           |



|           |                                                                   |                  |
|-----------|-------------------------------------------------------------------|------------------|
| 301292000 | Profuse watery sputum                                             | SNOMED           |
| 42192008  | Purulent sputum                                                   | SNOMED           |
| 274400006 | Pus in sputum O/E                                                 | SNOMED           |
| 2.00E+14  | Reflux cough                                                      | SNOMED           |
| 417850002 | Respiratory tract congestion and cough                            | SNOMED           |
| 24816000  | Rusty sputum                                                      | SNOMED           |
| 248601000 | Scanty sputum                                                     | SNOMED           |
| 46802002  | Smokers' cough                                                    | SNOMED           |
| 63000007  | Spasmodic cough                                                   | SNOMED           |
| 167987009 | Sputum - not infected                                             | SNOMED           |
| 248596009 | Sputum - symptom                                                  | SNOMED           |
| 271826006 | Sputum abnormal - amount                                          | SNOMED           |
| 271827002 | Sputum abnormal - color                                           | SNOMED           |
| 271828007 | Sputum abnormal - odor                                            | SNOMED           |
| 365443005 | Sputum appearance - finding                                       | SNOMED           |
| 167990003 | Sputum appears normal                                             | SNOMED           |
| 1.89E+16  | Sputum culture positive for extended beta lactam resistant E coli | Nebraska Lexicon |
| 168476005 | Sputum cytology                                                   | SNOMED           |
| 168477001 | Sputum cytology positive                                          | SNOMED           |
| 275719008 | Sputum evidence of infection                                      | SNOMED           |
| 167986000 | Sputum examination: abnormal                                      | SNOMED           |
| 167985001 | Sputum examination: normal                                        | SNOMED           |
| 248595008 | Sputum finding                                                    | SNOMED           |
| 758674005 | Sputum loose                                                      | SNOMED           |
| 167996009 | Sputum microscopy: NAD                                            | SNOMED           |
| 277357006 | Sputum retention                                                  | SNOMED           |
| 167999002 | Sputum: asbestos bodies                                           | SNOMED           |
| 168000008 | Sputum: blood cells present                                       | SNOMED           |
| 270031000 | Sputum: contains blood                                            | SNOMED           |
| 167997000 | Sputum: eosinophilia                                              | SNOMED           |
| 167991004 | Sputum: excessive - mucoid                                        | SNOMED           |
| 167998005 | Sputum: malignant cells                                           | SNOMED           |
| 168001007 | Sputum: pus cells present                                         | SNOMED           |
| 269912000 | Sputum: tubercle on Z-N stain                                     | SNOMED           |
| 277902000 | Stringy sputum                                                    | SNOMED           |
| 301294004 | Sweet smelling sputum                                             | SNOMED           |
| 277903005 | Thick sputum                                                      | SNOMED           |

|           |                                   |        |
|-----------|-----------------------------------|--------|
| 277904004 | Thin sputum                       | SNOMED |
| 248594007 | Tracheal esophageal fistula cough | SNOMED |
| 248590003 | Unable to cough                   | SNOMED |
| 225575005 | Unable to cough up sputum         | SNOMED |
| 306781003 | Unable to cough voluntarily       | SNOMED |
| 315246003 | Unexplained cough                 | SNOMED |
| 365446002 | Volume of sputum - finding        | SNOMED |
| 301291007 | Watery sputum                     | SNOMED |
| 427931002 | White sputum                      | SNOMED |
| 277907006 | Yellow sputum                     | SNOMED |

#### COVID Conditions

| Code      | Name                                                                  | Vocabulary |
|-----------|-----------------------------------------------------------------------|------------|
| 840539006 | Disease caused by 2019-nCoV                                           | SNOMED     |
| 840544004 | Suspected disease caused by 2019-nCoV                                 | SNOMED     |
| 186747009 | Coronavirus infection                                                 | SNOMED     |
| 27619001  | Disease due to Coronaviridae                                          | SNOMED     |
| 398447004 | Severe acute respiratory syndrome                                     | SNOMED     |
| 441590008 | Pneumonia due to Severe acute respiratory syndrome coronavirus        | SNOMED     |
| 6.51E+11  | Middle East respiratory syndrome                                      | SNOMED     |
| 715882005 | Severe acute respiratory syndrome of upper respiratory tract          | SNOMED     |
| 1.24E+15  | Myocarditis caused by 2019 novel coronavirus                          | SNOMED     |
| 1.24E+15  | Infection of upper respiratory tract caused by 2019 novel coronavirus | SNOMED     |
| 1.24E+15  | Pneumonia caused by 2019 novel coronavirus                            | SNOMED     |
| 1.24E+15  | Encephalopathy caused by 2019 novel coronavirus                       | SNOMED     |
| 1.24E+15  | Gastroenteritis caused by 2019 novel coronavirus                      | SNOMED     |
| 1.24E+15  | Otitis media caused by 2019 novel coronavirus                         | SNOMED     |

|             |                                                            |                |
|-------------|------------------------------------------------------------|----------------|
| 713084008   | Pneumonia caused by Human coronavirus                      | SNOMED         |
| 408688009   | Healthcare associated severe acute respiratory syndrome    | SNOMED         |
| OMOP4873908 | Infection of lower respiratory tract due to COVID-19       | OMOP Extension |
| OMOP4873910 | Asymptomatic COVID-19                                      | OMOP Extension |
| OMOP4873911 | Acute respiratory distress syndrome (ARDS) due to COVID-19 | OMOP Extension |
| OMOP4873907 | Respiratory infection due to COVID-19                      | OMOP Extension |
| OMOP4873909 | Bronchitis due to COVID-19                                 | OMOP Extension |
| OMOP4873906 | Acute bronchitis due to COVID-19                           | OMOP Extension |

#### Dementia or Memory Impairment or Inattentiveness

| Code      | Name                                                              | Vocabulary |
|-----------|-------------------------------------------------------------------|------------|
| 48167000  | Amnesia                                                           | SNOMED     |
| 26929004  | Alzheimer's disease                                               | SNOMED     |
| 52448006  | Dementia                                                          | SNOMED     |
| 191519005 | Dementia associated with another disease                          | SNOMED     |
| 409083006 | Finding related to attentiveness                                  | SNOMED     |
| 191449005 | Uncomplicated senile dementia                                     | SNOMED     |
| 1.59E+12  | Dementia with behavioral disturbance                              | SNOMED     |
| 40425004  | Postconcussion syndrome                                           | SNOMED     |
| 416975007 | Primary degenerative dementia of the Alzheimer type, senile onset | SNOMED     |
| 1.63E+16  | Vascular dementia without behavioral disturbance                  | SNOMED     |
| 70936005  | Multi-infarct dementia, uncomplicated                             | SNOMED     |
| 191461002 | Senile dementia with delirium                                     | SNOMED     |
| 191451009 | Uncomplicated presenile dementia                                  | SNOMED     |
| 2.89E+14  | Vascular dementia with behavioral disturbance                     | SNOMED     |

|           |                                                                      |                  |
|-----------|----------------------------------------------------------------------|------------------|
| 230736007 | Transient global amnesia                                             | SNOMED           |
| 10349009  | Multi-infarct dementia with delirium                                 | SNOMED           |
| 416780008 | Primary degenerative dementia of the Alzheimer type, presenile onset | SNOMED           |
| 371024007 | Senile dementia with delusion                                        | SNOMED           |
| 268612007 | Senile and presenile organic psychotic conditions                    | SNOMED           |
| 191459006 | Senile dementia with depression                                      | SNOMED           |
| 191452002 | Presenile dementia with delirium                                     | SNOMED           |
| 191455000 | Presenile dementia with depression                                   | SNOMED           |
| 76039005  | Disturbance of attention                                             | SNOMED           |
| 14070001  | Multi-infarct dementia with depression                               | SNOMED           |
| 22058002  | Inattention                                                          | SNOMED           |
| 25772007  | Multi-infarct dementia with delusions                                | SNOMED           |
| 3.11E+13  | Presenile dementia with delusions                                    | SNOMED           |
| 88822006  | Anterograde amnesia                                                  | SNOMED           |
| 51928006  | General paresis - neurosyphilis                                      | SNOMED           |
| 12348006  | Presenile dementia                                                   | SNOMED           |
| 429998004 | Vascular dementia                                                    | SNOMED           |
| 51921000  | Retrograde amnesia                                                   | SNOMED           |
| 288769005 | Able to direct attention                                             | SNOMED           |
| 716403002 | Able to divide attention                                             | SNOMED           |
| 716443007 | Able to shift attention                                              | SNOMED           |
| 716452003 | Able to sustain attention                                            | SNOMED           |
| 46991000  | Absent minded                                                        | SNOMED           |
| 783258000 | ADan amyloidosis                                                     | SNOMED           |
| 9.78E+13  | Altered behavior in Alzheimer's disease                              | SNOMED           |
| 8.24E+13  | Altered behavior in Huntington's dementia                            | SNOMED           |
| 1.42E+14  | Alzheimer's disease co-occurrent with delirium                       | SNOMED           |
| 2.46E+14  | Alzheimers continuum                                                 | Nebraska Lexicon |

|           |                                                                              |        |
|-----------|------------------------------------------------------------------------------|--------|
| 247607004 | Amnesia for day to day facts                                                 | SNOMED |
| 247611005 | Amnesia for important personal information                                   | SNOMED |
| 42176003  | Amnesia for recent events                                                    | SNOMED |
| 6149008   | Amnesia for remote events                                                    | SNOMED |
| 191464005 | Arteriosclerotic dementia with delirium                                      | SNOMED |
| 191466007 | Arteriosclerotic dementia with depression                                    | SNOMED |
| 191465006 | Arteriosclerotic dementia with paranoia                                      | SNOMED |
| 247768004 | Attends to adults' choice of activity                                        | SNOMED |
| 1.97E+14  | Attention delay                                                              | SNOMED |
| 1.62E+16  | Behavioral disturbance co-occurrent and due to late onset Alzheimer dementia | SNOMED |
| 1.42E+14  | Cognitive deficit in attention                                               | SNOMED |
| 725898002 | Delirium co-occurrent with dementia                                          | SNOMED |
| 1.42E+14  | Delusions in Alzheimer's disease                                             | SNOMED |
| 421529006 | Dementia associated with AIDS                                                | SNOMED |
| 698781002 | Dementia associated with cerebral anoxia                                     | SNOMED |
| 698624003 | Dementia associated with cerebral lipidosis                                  | SNOMED |
| 698626001 | Dementia associated with multiple sclerosis                                  | SNOMED |
| 698725008 | Dementia associated with neurosyphilis                                       | SNOMED |
| 698625002 | Dementia associated with normal pressure hydrocephalus                       | SNOMED |
| 425390006 | Dementia associated with Parkinson's Disease                                 | SNOMED |
| 698726009 | Dementia associated with viral encephalitis                                  | SNOMED |
| 733184002 | Dementia caused by heavy metal exposure                                      | SNOMED |
| 722978000 | Dementia caused by toxin                                                     | SNOMED |

|           |                                                                    |        |
|-----------|--------------------------------------------------------------------|--------|
| 788898005 | Dementia caused by volatile inhalant                               | SNOMED |
| 722977005 | Dementia co-occurrent and due to neurocysticercosis                | SNOMED |
| 713844000 | Dementia co-occurrent with human immunodeficiency virus infection  | SNOMED |
| 762351006 | Dementia due to and following injury of head                       | SNOMED |
| 722980006 | Dementia due to chromosomal anomaly                                | SNOMED |
| 733191004 | Dementia due to chronic subdural hematoma                          | SNOMED |
| 429458009 | Dementia due to Creutzfeldt Jakob disease                          | SNOMED |
| 724776007 | Dementia due to disorder of central nervous system                 | SNOMED |
| 733192006 | Dementia due to herpes encephalitis                                | SNOMED |
| 442344002 | Dementia due to Huntington chorea                                  | SNOMED |
| 724777003 | Dementia due to infectious disease                                 | SNOMED |
| 722979008 | Dementia due to metabolic abnormality                              | SNOMED |
| 8.24E+13  | Dementia due to multiple sclerosis with altered behavior           | SNOMED |
| 1.01E+14  | Dementia due to Parkinson's disease                                | SNOMED |
| 788899002 | Dementia due to pellagra                                           | SNOMED |
| 2.19E+13  | Dementia due to Pick's disease                                     | SNOMED |
| 733190003 | Dementia due to primary malignant neoplasm of brain                | SNOMED |
| 762350007 | Dementia due to prion disease                                      | SNOMED |
| 1.30E+14  | Dementia due to Rett's syndrome                                    | SNOMED |
| 733185001 | Dementia following injury caused by exposure to ionizing radiation | SNOMED |
| 698949001 | Dementia in remission                                              | SNOMED |

|           |                                                             |                  |
|-----------|-------------------------------------------------------------|------------------|
| 278857002 | Dementia of frontal lobe type                               | SNOMED           |
| 1.58E+12  | Dementia of the Alzheimer type with behavioral disturbance  | SNOMED           |
| 82959004  | Dementia paralytica juvenilis                               | SNOMED           |
| 9.96E+15  | Dementia with aggressive behavior                           | Nebraska Lexicon |
| 733194007 | Dementia with Down syndrome                                 | SNOMED           |
| 733193001 | Dementia with progressive multifocal leukoencephalopathy    | SNOMED           |
| 1.42E+14  | Depressed mood in Alzheimer's disease                       | SNOMED           |
| 9345005   | Dialysis dementia                                           | SNOMED           |
| 288773008 | Difficulty directing attention                              | SNOMED           |
| 1.07E+15  | Difficulty dividing attention                               | SNOMED           |
| 1.07E+15  | Difficulty shifting attention                               | SNOMED           |
| 1.07E+15  | Difficulty sustaining attention                             | SNOMED           |
| 28102002  | Distractibility                                             | SNOMED           |
| 416106008 | Disturbance of memory for order of events                   | SNOMED           |
| 288771005 | Does direct attention                                       | SNOMED           |
| 1.07E+15  | Does divide attention                                       | SNOMED           |
| 288772003 | Does not direct attention                                   | SNOMED           |
| 1.07E+15  | Does not divide attention                                   | SNOMED           |
| 1.07E+15  | Does not shift attention                                    | SNOMED           |
| 1.07E+15  | Does not sustain attention                                  | SNOMED           |
| 1.07E+15  | Does shift attention                                        | SNOMED           |
| 1.07E+15  | Does sustain attention                                      | SNOMED           |
| 1.32E+16  | Early Alzheimers disease                                    | Nebraska Lexicon |
| 1.05E+14  | Early onset Alzheimer's disease with behavioral disturbance | SNOMED           |
| 247764002 | Easily distracted                                           | SNOMED           |
| 724992007 | Epilepsy co-occurrent and due to dementia                   | SNOMED           |
| 8.24E+13  | Epileptic dementia with behavioral disturbance              | SNOMED           |
| 247763008 | Excessively focused attention                               | SNOMED           |
| 230265002 | Familial Alzheimer's disease of early onset                 | SNOMED           |

|           |                                                                          |                  |
|-----------|--------------------------------------------------------------------------|------------------|
| 230267005 | Familial Alzheimer's disease of late onset                               | SNOMED           |
| 365080005 | Finding related to ability to direct attention                           | SNOMED           |
| 230269008 | Focal Alzheimer's disease                                                | SNOMED           |
| 55533009  | Forgetful                                                                | SNOMED           |
| 2.42E+12  | Hallucinations co-occurrent and due to late onset dementia               | SNOMED           |
| 4.81E+14  | High level Alzheimers neuropathology changes                             | Nebraska Lexicon |
| 283878007 | Impairment of registration                                               | SNOMED           |
| 247767009 | Integrated attention for short spells                                    | SNOMED           |
| 4.81E+14  | Intermediate level Alzheimers neuropathology changes                     | Nebraska Lexicon |
| 723123001 | Ischemic vascular dementia                                               | SNOMED           |
| 4.71E+14  | Low level Alzheimers neuropathology changes                              | Nebraska Lexicon |
| 1.67E+16  | Memory deficit due to and following cerebrovascular accident             | SNOMED           |
| 1.67E+16  | Memory deficit due to and following cerebrovascular disease              | SNOMED           |
| 1.67E+16  | Memory deficit due to and following hemorrhagic cerebrovascular accident | SNOMED           |
| 1.67E+16  | Memory deficit due to and following ischemic cerebrovascular accident    | SNOMED           |
| 386807006 | Memory impairment                                                        | SNOMED           |
| 225038006 | Memory lapses                                                            | SNOMED           |
| 4.28E+14  | Mild dementia                                                            | SNOMED           |
| 192071009 | Mild memory disturbance                                                  | SNOMED           |
| 225037001 | Minor memory lapses                                                      | SNOMED           |
| 230287006 | Mixed cortical and subcortical vascular dementia                         | SNOMED           |
| 7.93E+13  | Mixed dementia                                                           | SNOMED           |
| 225039003 | Mixes past with present                                                  | SNOMED           |
| 4.31E+14  | Moderate dementia                                                        | SNOMED           |



|           |                                                                             |        |
|-----------|-----------------------------------------------------------------------------|--------|
| 56267009  | Multi-infarct dementia                                                      | SNOMED |
| 1.06E+14  | Multi-infarct dementia due to atherosclerosis                               | SNOMED |
| 722600006 | Non-amnestic Alzheimer disease                                              | SNOMED |
| 230266001 | Non-familial Alzheimer's disease of early onset                             | SNOMED |
| 230268000 | Non-familial Alzheimer's disease of late onset                              | SNOMED |
| 86713007  | Nonpersistence                                                              | SNOMED |
| 163616009 | O/E - easily distractable                                                   | SNOMED |
| 433081000 | Organic amnesia of language                                                 | SNOMED |
| 420614009 | Organic dementia associated with AIDS                                       | SNOMED |
| 32541007  | Paramnesia                                                                  | SNOMED |
| 62239001  | Parkinson-dementia complex of Guam                                          | SNOMED |
| 715737004 | Parkinsonism with dementia of Guadeloupe                                    | SNOMED |
| 230289009 | Patchy dementia                                                             | SNOMED |
| 247766000 | Pays attention to own choice of activity                                    | SNOMED |
| 247765001 | Pays fleeting attention                                                     | SNOMED |
| 130965009 | Persistence                                                                 | SNOMED |
| 26329005  | Poor concentration                                                          | SNOMED |
| 275277000 | Post-traumatic amnesia                                                      | SNOMED |
| 698687007 | Post-traumatic dementia with behavioral change                              | SNOMED |
| 1.09E+15  | Predominantly cortical dementia                                             | SNOMED |
| 1.09E+15  | Predominantly cortical vascular dementia                                    | SNOMED |
| 421023003 | Presenile dementia associated with AIDS                                     | SNOMED |
| 713488003 | Presenile dementia co-occurrent with human immunodeficiency virus infection | SNOMED |
| 191454001 | Presenile dementia with paranoia                                            | SNOMED |
| 1.09E+15  | Presenile dementia with psychosis                                           | SNOMED |

|           |                                                                                                |        |
|-----------|------------------------------------------------------------------------------------------------|--------|
| 2.24E+13  | Primary degenerative dementia                                                                  | SNOMED |
| 698955006 | Primary degenerative dementia of the Alzheimer type, presenile onset in remission              | SNOMED |
| 6475002   | Primary degenerative dementia of the Alzheimer type, presenile onset, uncomplicated            | SNOMED |
| 65096006  | Primary degenerative dementia of the Alzheimer type, presenile onset, with delirium            | SNOMED |
| 54502004  | Primary degenerative dementia of the Alzheimer type, presenile onset, with delusions           | SNOMED |
| 10532003  | Primary degenerative dementia of the Alzheimer type, presenile onset, with depression          | SNOMED |
| 698954005 | Primary degenerative dementia of the Alzheimer type, senile onset in remission                 | SNOMED |
| 66108005  | Primary degenerative dementia of the Alzheimer type, senile onset, uncomplicated               | SNOMED |
| 4.29E+14  | Primary degenerative dementia of the Alzheimer type, senile onset, with behavioral disturbance | SNOMED |
| 4817008   | Primary degenerative dementia of the Alzheimer type, senile onset, with delirium               | SNOMED |
| 55009008  | Primary degenerative dementia of the Alzheimer type, senile onset, with delusions              | SNOMED |

|           |                                                                                    |        |
|-----------|------------------------------------------------------------------------------------|--------|
| 26852004  | Primary degenerative dementia of the Alzheimer type, senile onset, with depression | SNOMED |
| 774069007 | PRKAR1B-related neurodegenerative dementia with intermediate filaments             | SNOMED |
| 230280008 | Progressive aphasia in Alzheimer's disease                                         | SNOMED |
| 230283005 | Punch drunk syndrome                                                               | SNOMED |
| 723390000 | Rapidly progressive dementia                                                       | SNOMED |
| 247761005 | Reduced concentration                                                              | SNOMED |
| 247762003 | Reduced concentration span                                                         | SNOMED |
| 26581009  | Retrospective falsification                                                        | SNOMED |
| 425248002 | Scattered attention                                                                | SNOMED |
| 25124003  | Selective inattention                                                              | SNOMED |
| 15662003  | Senile dementia                                                                    | SNOMED |
| 312991009 | Senile dementia of the Lewy body type                                              | SNOMED |
| 191457008 | Senile dementia with depressive or paranoid features                               | SNOMED |
| 191458003 | Senile dementia with paranoia                                                      | SNOMED |
| 371026009 | Senile dementia with psychosis                                                     | SNOMED |
| 4.28E+14  | Severe dementia                                                                    | SNOMED |
| 762707000 | Subcortical dementia                                                               | SNOMED |
| 90099008  | Subcortical leukoencephalopathy                                                    | SNOMED |
| 230286002 | Subcortical vascular dementia                                                      | SNOMED |
| 162200009 | Temporary loss of memory                                                           | SNOMED |
| 395689002 | Transient epileptic amnesia                                                        | SNOMED |
| 307413004 | Transient memory loss                                                              | SNOMED |
| 230282000 | Traumatic encephalopathy                                                           | SNOMED |
| 60032008  | Unable to concentrate                                                              | SNOMED |
| 288770006 | Unable to direct attention                                                         | SNOMED |
| 1.07E+15  | Unable to divide attention                                                         | SNOMED |
| 1.08E+15  | Unable to shift attention                                                          | SNOMED |
| 1.08E+15  | Unable to sustain attention                                                        | SNOMED |
| 191463004 | Uncomplicated arteriosclerotic dementia                                            | SNOMED |

|           |                                      |        |
|-----------|--------------------------------------|--------|
| 698948009 | Vascular dementia in remission       | SNOMED |
| 230285003 | Vascular dementia of acute onset     | SNOMED |
| 247769007 | Well controlled integrated attention | SNOMED |

## Depression

| Code      | Name                                                                | Vocabulary |
|-----------|---------------------------------------------------------------------|------------|
| 66344007  | Recurrent major depression                                          | SNOMED     |
| 36923009  | Major depression, single episode                                    | SNOMED     |
| 13746004  | Bipolar disorder                                                    | SNOMED     |
| 68890003  | Schizoaffective disorder                                            | SNOMED     |
| 36474008  | Severe recurrent major depression without psychotic features        | SNOMED     |
| 18818009  | Moderate recurrent major depression                                 | SNOMED     |
| 191618007 | Bipolar affective disorder, current episode manic                   | SNOMED     |
| 191627008 | Bipolar affective disorder, current episode depression              | SNOMED     |
| 191613003 | Recurrent major depressive episodes, severe, with psychosis         | SNOMED     |
| 83225003  | Bipolar II disorder                                                 | SNOMED     |
| 33135002  | Recurrent major depression in partial remission                     | SNOMED     |
| 16506000  | Mixed bipolar I disorder                                            | SNOMED     |
| 76441001  | Severe major depression, single episode, without psychotic features | SNOMED     |
| 40379007  | Mild recurrent major depression                                     | SNOMED     |
| 371596008 | Bipolar I disorder                                                  | SNOMED     |
| 191623007 | Bipolar affective disorder, currently manic, severe, with psychosis | SNOMED     |
| 38368003  | Schizoaffective disorder, bipolar type                              | SNOMED     |

|           |                                                                |        |
|-----------|----------------------------------------------------------------|--------|
| 15639000  | Moderate major depression, single episode                      | SNOMED |
| 46244001  | Recurrent major depression in full remission                   | SNOMED |
| 79298009  | Mild major depression, single episode                          | SNOMED |
| 191611001 | Recurrent major depressive episodes, moderate                  | SNOMED |
| 19527009  | Single episode of major depression in full remission           | SNOMED |
| 68019004  | Recurrent major depression in remission                        | SNOMED |
| 84760002  | Schizoaffective disorder, depressive type                      | SNOMED |
| 9340000   | Bipolar I disorder, single manic episode                       | SNOMED |
| 70747007  | Major depression single episode, in partial remission          | SNOMED |
| 61403008  | Severe depressed bipolar I disorder without psychotic features | SNOMED |
| 191570001 | Chronic schizoaffective schizophrenia                          | SNOMED |
| 162004    | Severe manic bipolar I disorder without psychotic features     | SNOMED |
| 191610000 | Recurrent major depressive episodes, mild                      | SNOMED |
| 191630001 | Bipolar affective disorder, currently depressed, moderate      | SNOMED |
| 191641004 | Mixed bipolar affective disorder, severe, with psychosis       | SNOMED |
| 191572009 | Acute exacerbation of chronic schizoaffective schizophrenia    | SNOMED |
| 31446002  | Bipolar I disorder, most recent episode hypomanic              | SNOMED |
| 192362008 | Bipolar affective disorder, current episode mixed              | SNOMED |

|           |                                                                                    |        |
|-----------|------------------------------------------------------------------------------------|--------|
| 59617007  | Severe depressed bipolar I disorder with psychotic features                        | SNOMED |
| 191629006 | Bipolar affective disorder, currently depressed, mild                              | SNOMED |
| 49512000  | Depressed bipolar I disorder in partial remission                                  | SNOMED |
| 85248005  | Bipolar disorder in remission                                                      | SNOMED |
| 765176007 | Psychosis and severe depression co-occurrent and due to bipolar affective disorder | SNOMED |
| 46229002  | Severe mixed bipolar I disorder without psychotic features                         | SNOMED |
| 191639000 | Mixed bipolar affective disorder, moderate                                         | SNOMED |
| 191621009 | Bipolar affective disorder, currently manic, moderate                              | SNOMED |
| 63249007  | Manic bipolar I disorder in partial remission                                      | SNOMED |
| 22121000  | Depressed bipolar I disorder in full remission                                     | SNOMED |
| 191638008 | Mixed bipolar affective disorder, mild                                             | SNOMED |
| 41832009  | Severe bipolar I disorder, single manic episode with psychotic features            | SNOMED |
| 30935000  | Manic bipolar I disorder in full remission                                         | SNOMED |
| 111485001 | Mixed bipolar I disorder in full remission                                         | SNOMED |
| 191620005 | Bipolar affective disorder, currently manic, mild                                  | SNOMED |
| 36583000  | Mixed bipolar I disorder in partial remission                                      | SNOMED |
| 191569002 | Subchronic schizoaffective schizophrenia                                           | SNOMED |
| 191616006 | Recurrent depression                                                               | SNOMED |
| 5703000   | Bipolar disorder in partial remission                                              | SNOMED |

|           |                                                                                        |                  |
|-----------|----------------------------------------------------------------------------------------|------------------|
| 14495005  | Severe bipolar I disorder, single manic episode without psychotic features             | SNOMED           |
| 41836007  | Bipolar disorder in full remission                                                     | SNOMED           |
| 191571002 | Acute exacerbation of subchronic schizoaffective schizophrenia                         | SNOMED           |
| 41552001  | Mild bipolar I disorder, single manic episode                                          | SNOMED           |
| 191634005 | Bipolar affective disorder, currently depressed, in full remission                     | SNOMED           |
| 28884001  | Moderate bipolar I disorder, single manic episode                                      | SNOMED           |
| 191625000 | Bipolar affective disorder, currently manic, in full remission                         | SNOMED           |
| 191574005 | Schizoaffective schizophrenia in remission                                             | SNOMED           |
| 191643001 | Mixed bipolar affective disorder, in full remission                                    | SNOMED           |
| 75360000  | Bipolar I disorder, single manic episode, in remission                                 | SNOMED           |
| 3530005   | Bipolar I disorder, single manic episode, in full remission                            | SNOMED           |
| 7.55E+14  | [X]Recurrent major depressive episodes, severe, with psychosis, psychosis in remission | SNOMED           |
| 7.55E+14  | [X]Single major depressive episode, severe, with psychosis, psychosis in remission     | SNOMED           |
| 767633005 | Bipolar affective disorder, most recent episode mixed                                  | SNOMED           |
| 1.45E+16  | Bipolar disease in pregnancy                                                           | Nebraska Lexicon |
| 1.62E+16  | Bipolar disorder caused by drug                                                        | SNOMED           |
| 767631007 | Bipolar disorder, most recent episode depression                                       | SNOMED           |

|           |                                                                             |        |
|-----------|-----------------------------------------------------------------------------|--------|
| 767632000 | Bipolar disorder, most recent episode manic                                 | SNOMED |
| 29929003  | Bipolar I disorder, most recent episode depressed with atypical features    | SNOMED |
| 21900002  | Bipolar I disorder, most recent episode depressed with catatonic features   | SNOMED |
| 75752004  | Bipolar I disorder, most recent episode depressed with melancholic features | SNOMED |
| 87203005  | Bipolar I disorder, most recent episode depressed with postpartum onset     | SNOMED |
| 767636002 | Bipolar I disorder, most recent episode depression                          | SNOMED |
| 767635003 | Bipolar I disorder, most recent episode manic                               | SNOMED |
| 17782008  | Bipolar I disorder, most recent episode manic with catatonic features       | SNOMED |
| 55516002  | Bipolar I disorder, most recent episode manic with postpartum onset         | SNOMED |
| 73471000  | Bipolar I disorder, most recent episode mixed with catatonic features       | SNOMED |
| 65042007  | Bipolar I disorder, most recent episode mixed with postpartum onset         | SNOMED |
| 87950005  | Bipolar I disorder, single manic episode with catatonic features            | SNOMED |
| 1499003   | Bipolar I disorder, single manic episode with postpartum onset              | SNOMED |
| 78269000  | Bipolar I disorder, single manic episode, in partial remission              | SNOMED |
| 48937005  | Bipolar II disorder, most recent episode hypomanic                          | SNOMED |



|           |                                                                                     |        |
|-----------|-------------------------------------------------------------------------------------|--------|
| 16295005  | Bipolar II disorder, most recent episode major depressive                           | SNOMED |
| 43568002  | Bipolar II disorder, most recent episode major depressive with atypical features    | SNOMED |
| 22407005  | Bipolar II disorder, most recent episode major depressive with catatonic features   | SNOMED |
| 34315001  | Bipolar II disorder, most recent episode major depressive with melancholic features | SNOMED |
| 30687003  | Bipolar II disorder, most recent episode major depressive with postpartum onset     | SNOMED |
| 723903001 | Bipolar type I disorder currently in full remission                                 | SNOMED |
| 723905008 | Bipolar type II disorder currently in full remission                                | SNOMED |
| 51637008  | Chronic bipolar I disorder, most recent episode depressed                           | SNOMED |
| 1196001   | Chronic bipolar II disorder, most recent episode major depressive                   | SNOMED |
| 14183003  | Chronic major depressive disorder, single episode                                   | SNOMED |
| 2618002   | Chronic recurrent major depressive disorder                                         | SNOMED |
| 49468007  | Depressed bipolar I disorder                                                        | SNOMED |
| 53607008  | Depressed bipolar I disorder in remission                                           | SNOMED |
| 274948002 | Endogenous depression - recurrent                                                   | SNOMED |
| 42925002  | Major depressive disorder, single episode with atypical features                    | SNOMED |

|           |                                                                         |        |
|-----------|-------------------------------------------------------------------------|--------|
| 69392006  | Major depressive disorder, single episode with catatonic features       | SNOMED |
| 63778009  | Major depressive disorder, single episode with melancholic features     | SNOMED |
| 25922000  | Major depressive disorder, single episode with postpartum onset         | SNOMED |
| 68569003  | Manic bipolar I disorder                                                | SNOMED |
| 45479006  | Manic bipolar I disorder in remission                                   | SNOMED |
| 13313007  | Mild bipolar disorder                                                   | SNOMED |
| 71294008  | Mild bipolar II disorder, most recent episode major depressive          | SNOMED |
| 74686005  | Mild depressed bipolar I disorder                                       | SNOMED |
| 1.63E+16  | Mild major depressive disorder co-occurrent with anxiety single episode | SNOMED |
| 71984005  | Mild manic bipolar I disorder                                           | SNOMED |
| 43769008  | Mild mixed bipolar I disorder                                           | SNOMED |
| 720454007 | Minimal major depression single episode                                 | SNOMED |
| 720451004 | Minimal recurrent major depression                                      | SNOMED |
| 191636007 | Mixed bipolar affective disorder                                        | SNOMED |
| 7.61E+14  | Mixed bipolar affective disorder, in partial remission                  | SNOMED |
| 7.65E+14  | Mixed bipolar affective disorder, severe                                | SNOMED |
| 35481005  | Mixed bipolar I disorder in remission                                   | SNOMED |
| 79584002  | Moderate bipolar disorder                                               | SNOMED |
| 35846004  | Moderate bipolar II disorder, most recent episode major depressive      | SNOMED |
| 66631006  | Moderate depressed bipolar I disorder                                   | SNOMED |

|           |                                                                                    |        |
|-----------|------------------------------------------------------------------------------------|--------|
| 1.63E+16  | Moderate major depressive disorder co-occurrent with anxiety single episode        | SNOMED |
| 82998009  | Moderate manic bipolar I disorder                                                  | SNOMED |
| 40926005  | Moderate mixed bipolar I disorder                                                  | SNOMED |
| 720453001 | Moderately severe major depression single episode                                  | SNOMED |
| 720452006 | Moderately severe recurrent major depression                                       | SNOMED |
| 231444002 | Organic bipolar disorder                                                           | SNOMED |
| 1.33E+14  | Rapid cycling bipolar I disorder                                                   | SNOMED |
| 789061003 | Rapid cycling bipolar II disorder                                                  | SNOMED |
| 40568001  | Recurrent brief depressive disorder                                                | SNOMED |
| 1.09E+15  | Recurrent depression with current moderate episode                                 | SNOMED |
| 1.09E+15  | Recurrent depression with current severe episode and psychotic features            | SNOMED |
| 1.09E+15  | Recurrent depression with current severe episode without psychotic features        | SNOMED |
| 1.63E+16  | Recurrent major depressive disorder co-occurrent with anxiety in full remission    | SNOMED |
| 1.63E+16  | Recurrent major depressive disorder in partial remission co-occurrent with anxiety | SNOMED |
| 38694004  | Recurrent major depressive disorder with atypical features                         | SNOMED |
| 39809009  | Recurrent major depressive disorder with catatonic features                        | SNOMED |
| 319768000 | Recurrent major depressive disorder with melancholic features                      | SNOMED |

|           |                                                                                         |        |
|-----------|-----------------------------------------------------------------------------------------|--------|
| 71336009  | Recurrent major depressive disorder with postpartum onset                               | SNOMED |
| 268621008 | Recurrent major depressive episodes                                                     | SNOMED |
| 7.65E+14  | Recurrent major depressive episodes, in partial remission                               | SNOMED |
| 7.65E+14  | Recurrent major depressive episodes, in remission                                       | SNOMED |
| 7.65E+14  | Recurrent major depressive episodes, severe                                             | SNOMED |
| 1.63E+16  | Recurrent mild major depressive disorder co-occurrent with anxiety                      | SNOMED |
| 1.63E+16  | Recurrent moderate major depressive disorder co-occurrent with anxiety                  | SNOMED |
| 1.63E+16  | Recurrent severe major depressive disorder co-occurrent with anxiety                    | SNOMED |
| 271428004 | Schizoaffective disorder, manic type                                                    | SNOMED |
| 270901009 | Schizoaffective disorder, mixed type                                                    | SNOMED |
| 191567000 | Schizoaffective schizophrenia                                                           | SNOMED |
| 247803002 | Seasonal affective disorder                                                             | SNOMED |
| 371600003 | Severe bipolar disorder                                                                 | SNOMED |
| 4441000   | Severe bipolar disorder with psychotic features                                         | SNOMED |
| 70546001  | Severe bipolar disorder with psychotic features, mood-congruent                         | SNOMED |
| 26530004  | Severe bipolar disorder with psychotic features, mood-incongruent                       | SNOMED |
| 53049002  | Severe bipolar disorder without psychotic features                                      | SNOMED |
| 371599001 | Severe bipolar I disorder                                                               | SNOMED |
| 13581000  | Severe bipolar I disorder, single manic episode with psychotic features, mood-congruent | SNOMED |

|           |                                                                                                            |        |
|-----------|------------------------------------------------------------------------------------------------------------|--------|
| 86058007  | Severe bipolar I disorder, single manic episode with psychotic features, mood-incongruent                  | SNOMED |
| 371604007 | Severe bipolar II disorder                                                                                 | SNOMED |
| 30520009  | Severe bipolar II disorder, most recent episode major depressive with psychotic features                   | SNOMED |
| 19300006  | Severe bipolar II disorder, most recent episode major depressive with psychotic features, mood-congruent   | SNOMED |
| 20960007  | Severe bipolar II disorder, most recent episode major depressive with psychotic features, mood-incongruent | SNOMED |
| 81319007  | Severe bipolar II disorder, most recent episode major depressive without psychotic features                | SNOMED |
| 12969000  | Severe bipolar II disorder, most recent episode major depressive, in full remission                        | SNOMED |
| 67002003  | Severe bipolar II disorder, most recent episode major depressive, in partial remission                     | SNOMED |
| 35722002  | Severe bipolar II disorder, most recent episode major depressive, in remission                             | SNOMED |
| 2.61E+11  | Severe depressed bipolar I disorder                                                                        | SNOMED |
| 54761006  | Severe depressed bipolar I disorder with psychotic features, mood-congruent                                | SNOMED |
| 26203008  | Severe depressed bipolar I disorder with psychotic features, mood-incongruent                              | SNOMED |
| 2.51E+11  | Severe major depression, single episode                                                                    | SNOMED |
| 77911002  | Severe major depression, single episode, with                                                              | SNOMED |

|          |                                                                                    |        |
|----------|------------------------------------------------------------------------------------|--------|
|          | psychotic features, mood-congruent                                                 |        |
| 20250007 | Severe major depression, single episode, with psychotic features, mood-incongruent | SNOMED |
| 1.63E+16 | Severe major depressive disorder co-occurrent with anxiety single episode          | SNOMED |
| 2.37E+13 | Severe manic bipolar I disorder                                                    | SNOMED |
| 28663008 | Severe manic bipolar I disorder with psychotic features                            | SNOMED |
| 78640000 | Severe manic bipolar I disorder with psychotic features, mood-congruent            | SNOMED |
| 33380008 | Severe manic bipolar I disorder with psychotic features, mood-incongruent          | SNOMED |
| 2.71E+11 | Severe mixed bipolar I disorder                                                    | SNOMED |
| 10981006 | Severe mixed bipolar I disorder with psychotic features                            | SNOMED |
| 64731001 | Severe mixed bipolar I disorder with psychotic features, mood-congruent            | SNOMED |
| 10875004 | Severe mixed bipolar I disorder with psychotic features, mood-incongruent          | SNOMED |
| 2.81E+11 | Severe recurrent major depression                                                  | SNOMED |
| 28475009 | Severe recurrent major depression with psychotic features                          | SNOMED |
| 33078009 | Severe recurrent major depression with psychotic features, mood-congruent          | SNOMED |
| 15193003 | Severe recurrent major depression with psychotic features, mood-incongruent        | SNOMED |

|           |                                                         |        |
|-----------|---------------------------------------------------------|--------|
| 1.33E+14  | Severe seasonal affective disorder                      | SNOMED |
| 7.65E+14  | Single major depressive episode, in remission           | SNOMED |
| 191604000 | Single major depressive episode, severe, with psychosis | SNOMED |

## Dyspnea

| Code      | Name                                             | Vocabulary |
|-----------|--------------------------------------------------|------------|
| 267036007 | Dyspnea                                          | SNOMED     |
| 60845006  | Dyspnea on exertion                              | SNOMED     |
| 397702004 | Borg Breathlessness Score finding                | SNOMED     |
| 401275008 | Borg Breathlessness Score: 0 none at all         | SNOMED     |
| 401323002 | Borg Breathlessness Score: 0.5 very, very slight | SNOMED     |
| 401279002 | Borg Breathlessness Score: 1 very slight         | SNOMED     |
| 401293009 | Borg Breathlessness Score: 10 maximal            | SNOMED     |
| 401280004 | Borg Breathlessness Score: 2 slight              | SNOMED     |
| 401281000 | Borg Breathlessness Score: 3 moderate            | SNOMED     |
| 401282007 | Borg Breathlessness Score: 4 somewhat severe     | SNOMED     |
| 401284008 | Borg Breathlessness Score: 5 severe              | SNOMED     |
| 401286005 | Borg Breathlessness Score: 6 severe              | SNOMED     |
| 401290007 | Borg Breathlessness Score: 7 very severe         | SNOMED     |
| 401291006 | Borg Breathlessness Score: 8 very severe         | SNOMED     |
| 401292004 | Borg Breathlessness Score: 9 very, very severe   | SNOMED     |
| 161940008 | Breathless - mild exertion                       | SNOMED     |
| 161939006 | Breathless - moderate exertion                   | SNOMED     |

|           |                                                                  |        |
|-----------|------------------------------------------------------------------|--------|
| 390871002 | Breathless - strenuous exertion                                  | SNOMED |
| 57769004  | Dyspnea after eating                                             | SNOMED |
| 422177004 | Dyspnea associated with AIDS                                     | SNOMED |
| 161941007 | Dyspnea at rest                                                  | SNOMED |
| 20112008  | Dyspnea leaning over                                             | SNOMED |
| 24921003  | Dyspnea raising arms                                             | SNOMED |
| 17216000  | Dyspnea, class I                                                 | SNOMED |
| 72365000  | Dyspnea, class II                                                | SNOMED |
| 39950000  | Dyspnea, class III                                               | SNOMED |
| 73322006  | Dyspnea, class IV                                                | SNOMED |
| 1.09E+15  | eMRC (extended Medical Research Council) dyspnoea scale grade 1  | SNOMED |
| 1.09E+15  | eMRC (extended Medical Research Council) dyspnoea scale grade 2  | SNOMED |
| 1.09E+15  | eMRC (extended Medical Research Council) dyspnoea scale grade 3  | SNOMED |
| 1.09E+15  | eMRC (extended Medical Research Council) dyspnoea scale grade 4  | SNOMED |
| 1.09E+15  | eMRC (extended Medical Research Council) dyspnoea scale grade 5a | SNOMED |
| 1.09E+15  | eMRC (extended Medical Research Council) dyspnoea scale grade 5b | SNOMED |
| 34560001  | Expiratory dyspnea                                               | SNOMED |
| 23141003  | Gasping for breath                                               | SNOMED |
| 297216006 | Increasing breathlessness                                        | SNOMED |
| 25209001  | Inspiratory dyspnea                                              | SNOMED |
| 391120009 | Medical Research Council Dyspnoea scale grade 1                  | SNOMED |
| 391123006 | Medical Research Council Dyspnoea scale grade 2                  | SNOMED |
| 391124000 | Medical Research Council Dyspnoea scale grade 3                  | SNOMED |
| 391125004 | Medical Research Council Dyspnoea scale grade 4                  | SNOMED |



|           |                                                                       |        |
|-----------|-----------------------------------------------------------------------|--------|
| 391126003 | Medical Research Council<br>Dyspnoea scale grade 5                    | SNOMED |
| 8.52E+14  | Minimal breathlessness                                                | SNOMED |
| 1.10E+15  | mMRC (modified Medical<br>Research Council) dyspnoea<br>scale grade 0 | SNOMED |
| 1.10E+15  | mMRC (modified Medical<br>Research Council) dyspnoea<br>scale grade 1 | SNOMED |
| 1.10E+15  | mMRC (modified Medical<br>Research Council) dyspnoea<br>scale grade 2 | SNOMED |
| 1.10E+15  | mMRC (modified Medical<br>Research Council) dyspnoea<br>scale grade 3 | SNOMED |
| 1.10E+15  | mMRC (modified Medical<br>Research Council) dyspnoea<br>scale grade 4 | SNOMED |
| 248548009 | Nocturnal dyspnea                                                     | SNOMED |
| 162890008 | O/E - dyspnea                                                         | SNOMED |
| 59265000  | Paroxysmal dyspnea                                                    | SNOMED |
| 55442000  | Paroxysmal nocturnal<br>dyspnea                                       | SNOMED |
| 30744009  | Platypnea                                                             | SNOMED |
| 390870001 | Short of breath<br>dressing/undressing                                | SNOMED |
| 102577000 | Trepopnea                                                             | SNOMED |
| 407588003 | Unable to complete a<br>sentence in one breath                        | SNOMED |

#### Fever

| Code      | Name                      | Vocabulary |
|-----------|---------------------------|------------|
| 386661006 | Fever                     | SNOMED     |
| 41497008  | Febrile convulsion        | SNOMED     |
| 432354000 | Simple febrile seizure    | SNOMED     |
| 420079008 | Relapsing fever           | SNOMED     |
| 433083002 | Complex febrile seizure   | SNOMED     |
| 722892007 | Fever due to infection    | SNOMED     |
| 186694006 | Sweating fever            | SNOMED     |
| 1.02E+13  | Viral fever               | SNOMED     |
| 704425001 | Chronic fever             | SNOMED     |
| 7520000   | Pyrexia of unknown origin | SNOMED     |

|           |                                     |        |
|-----------|-------------------------------------|--------|
| 9619006   | Aseptic fever                       | SNOMED |
| 77957000  | Intermittent fever                  | SNOMED |
| 63993003  | Remittent fever                     | SNOMED |
| 365989009 | Phase of fever - finding            | SNOMED |
| 365977007 | Pattern of fever - finding          | SNOMED |
| 409702008 | Hyperpyrexia                        | SNOMED |
| 42136008  | Swinging fever                      | SNOMED |
| 274640006 | Fever with chills                   | SNOMED |
| 271753002 | Irregular fever                     | SNOMED |
| 271752007 | Staircase fever                     | SNOMED |
| 271751000 | Continuous fever                    | SNOMED |
| 271750004 | Gradual rise of fever               | SNOMED |
| 271749004 | Acute rise of fever                 | SNOMED |
| 271897009 | O/E - fever                         | SNOMED |
| 271755009 | Gradual fall of fever               | SNOMED |
| 271754008 | Rapid fall of fever                 | SNOMED |
| 307200007 | Recurrent febrile convulsion        | SNOMED |
| 426000000 | Fever greater than 100.4 Fahrenheit | SNOMED |
| 304213008 | Low grade pyrexia                   | SNOMED |
| 248447001 | Fever defervescence                 | SNOMED |
| 248443002 | Intermittent hepatic fever          | SNOMED |
| 248436008 | Slightly remittent fever            | SNOMED |
| 248432005 | Rising phase of fever               | SNOMED |
| 248435007 | Prolonged fever                     | SNOMED |
| 248449003 | Central fever                       | SNOMED |
| 248445009 | Fever, diurnal variation            | SNOMED |
| 248444008 | Biphasic fever                      | SNOMED |
| 248434006 | Falling phase of fever              | SNOMED |
| 248433000 | Plateau phase of fever              | SNOMED |
| 135883003 | Cough with fever                    | SNOMED |
| 230432008 | Familial febrile convulsions        | SNOMED |
| 164311002 | O/E - fever - remittent             | SNOMED |
| 164316007 | O/E - fever-gradual fall-lysis      | SNOMED |
| 164314005 | O/E - fever - irregular             | SNOMED |
| 164309006 | O/E - fever - continuous            | SNOMED |
| 164315006 | O/E - fever - fast fall-crisis      | SNOMED |
| 164307008 | O/E - fever - acute rise            | SNOMED |
| 164288004 | O/E - pyrexia of unknown origin     | SNOMED |
| 164312009 | O/E - fever - intermittent          | SNOMED |
| 164308003 | O/E - fever - gradual rise          | SNOMED |

|           |                                                        |                  |
|-----------|--------------------------------------------------------|------------------|
| 164304001 | O/E - hyperpyrexia - greater than 40.5 degrees Celsius | SNOMED           |
| 163595003 | O/E - febrile convulsion                               | SNOMED           |
| 102496004 | Spiking fever                                          | SNOMED           |
| 111950007 | Factitious fever                                       | SNOMED           |
| 1.14E+16  | Neutropenic fever                                      | Nebraska Lexicon |
| 4.34E+14  | Complex febrile seizure, refractory                    | SNOMED           |
| 4.34E+14  | Simple febrile seizure, non-refractory                 | SNOMED           |
| 4.34E+14  | Simple febrile seizure, refractory                     | SNOMED           |
| 4.34E+14  | Complex febrile seizure, non-refractory                | SNOMED           |

#### Influenza Conditions

| Code      | Name                                                    | Vocabulary |
|-----------|---------------------------------------------------------|------------|
| 1.07E+16  | Upper respiratory tract infection due to Influenza      | SNOMED     |
| 195878008 | Pneumonia and influenza                                 | SNOMED     |
| 772839003 | Pneumonia caused by Influenza A virus                   | SNOMED     |
| 6142004   | Influenza                                               | SNOMED     |
| 3.29E+14  | Upper respiratory tract infection due to Influenza A    | SNOMED     |
| 61700007  | Influenza with non-respiratory manifestation            | SNOMED     |
| 1.43E+14  | Upper respiratory tract infection due to H1N1 influenza | SNOMED     |
| 442696006 | Influenza due to Influenza A virus subtype H1N1         | SNOMED     |
| 1.43E+14  | Pneumonia due to H1N1 influenza                         | SNOMED     |
| 772828001 | Influenza caused by Influenza A virus subtype H5N1      | SNOMED     |
| 442438000 | Influenza due to Influenza A virus                      | SNOMED     |
| 195929004 | Influenza with gastrointestinal tract involvement       | SNOMED     |
| 1.06E+16  | Otitis media due to influenza                           | SNOMED     |

|           |                                                          |        |
|-----------|----------------------------------------------------------|--------|
| 74644004  | Influenza with encephalopathy                            | SNOMED |
| 1.07E+16  | Encephalopathy due to Influenza A virus                  | SNOMED |
| 1.43E+14  | Gastroenteritis due to H1N1 influenza                    | SNOMED |
| 1.63E+13  | Pneumonia due to influenza                               | SNOMED |
| 1.43E+14  | Encephalopathy due to H1N1 influenza                     | SNOMED |
| 1.43E+14  | Myocarditis due to Influenza A virus subtype H1N1        | SNOMED |
| 1.07E+16  | Otitis media due to Influenza A virus                    | SNOMED |
| 1.06E+16  | Myocarditis due to Influenza A virus                     | SNOMED |
| 1.06E+16  | Bronchiolitis caused by influenza virus                  | SNOMED |
| 1.06E+16  | Gastroenteritis due to Influenza A virus                 | SNOMED |
| 1.06E+16  | Gastroenteritis due to influenza                         | SNOMED |
| 1.06E+16  | Otitis media due to H1N1 influenza                       | SNOMED |
| 707448003 | Influenza due to Influenza A virus subtype H7N9          | SNOMED |
| 450716003 | Influenza due to Influenza A virus subtype H9            | SNOMED |
| 450715004 | Influenza due to Influenza A virus subtype H7            | SNOMED |
| 738276008 | Influenza with CNS disorder                              | SNOMED |
| 1.03E+15  | Influenza with pneumonia due to seasonal influenza virus | SNOMED |
| 1.03E+15  | Influenza due to seasonal influenza virus                | SNOMED |
| 1.03E+15  | Influenza due to pandemic influenza virus                | SNOMED |
| 1.03E+15  | Influenza due to zoonotic influenza virus                | SNOMED |
| 713083002 | Influenza caused by Influenza A virus subtype H5         | SNOMED |
| 719865001 | Influenza caused by pandemic influenza virus             | SNOMED |

|           |                                                                 |        |
|-----------|-----------------------------------------------------------------|--------|
| 719590007 | Influenza caused by seasonal influenza virus                    | SNOMED |
| 772810003 | Influenza caused by Influenza A virus subtype H3N2              | SNOMED |
| 81524006  | Influenza due to Influenza C virus                              | SNOMED |
| 78046005  | Myocarditis due to influenza virus                              | SNOMED |
| 408687004 | Healthcare associated influenza disease                         | SNOMED |
| 41269000  | Influenzal bronchopneumonia                                     | SNOMED |
| 43692000  | Influenzal acute upper respiratory infection                    | SNOMED |
| 309789002 | Encephalitis due to influenza                                   | SNOMED |
| 195923003 | Influenza with laryngitis                                       | SNOMED |
| 195924009 | Influenza with pharyngitis                                      | SNOMED |
| 194946005 | Acute myocarditis - influenzal                                  | SNOMED |
| 24662006  | Influenza due to Influenza B virus                              | SNOMED |
| 4.35E+14  | Influenza due to Influenza A virus with upper respiratory signs | SNOMED |
| 4.35E+14  | Pneumonia due to Influenza A virus subtype H1N1                 | SNOMED |
| 4.35E+14  | Pneumonia due to Influenza A virus                              | SNOMED |

#### Precoordinated Influenza Conditions

| Code      | Name                                                      | Vocabulary |
|-----------|-----------------------------------------------------------|------------|
| 702482001 | Influenza A H1N1 virus 2009 pandemic strain present       | SNOMED     |
| 1.81E+11  | Influenza A virus present                                 | SNOMED     |
| 2.31E+11  | Influenza A virus subtype H1 2009 pandemic strain present | SNOMED     |
| 441043003 | Influenza A virus subtype H1 present                      | SNOMED     |
| 711330007 | Influenza A virus subtype H1N1 detected                   | SNOMED     |

|           |                                                    |        |
|-----------|----------------------------------------------------|--------|
| 440927002 | Influenza A virus subtype H2 present               | SNOMED |
| 441049004 | Influenza A virus subtype H3 present               | SNOMED |
| 1.01E+12  | Influenza A virus subtype H5 asian strain detected | SNOMED |
| 441343005 | Influenza A virus subtype H5 present               | SNOMED |
| 708119004 | Influenza A virus subtype H7 present               | SNOMED |
| 708120005 | Influenza A virus subtype H9 present               | SNOMED |
| 699872005 | Influenza A virus untyped strain present           | SNOMED |
| 441345003 | Influenza B virus present                          | SNOMED |

#### Influenza Tests

| Code    | Name                                                                       | Vocabulary |
|---------|----------------------------------------------------------------------------|------------|
| 49520-0 | Influenza virus A H1 RNA [Presence] in Isolate by NAA with probe detection | LOINC      |
| 49535-8 | Influenza virus B RNA [Presence] in Isolate by NAA with probe detection    | LOINC      |
| 49531-7 | Influenza virus A RNA [Presence] in Isolate by NAA with probe detection    | LOINC      |
| 49523-4 | Influenza virus A H3 RNA [Presence] in Isolate by NAA with probe detection | LOINC      |
| 31437-7 | Influenza virus A IgG Ab [Units/volume] in Serum                           | LOINC      |
| 7920-2  | Influenza virus A Ab [Units/volume] in Serum                               | LOINC      |
| 22365-1 | Influenza virus A Ab [Titer] in Serum                                      | LOINC      |

#### Joint Pain

| Code      | Name                | Vocabulary |
|-----------|---------------------|------------|
| 267949000 | Shoulder joint pain | SNOMED     |

|           |                                                                |                  |
|-----------|----------------------------------------------------------------|------------------|
| 30989003  | Knee pain                                                      | SNOMED           |
| 267954009 | Arthralgia of the ankle and/or foot                            | SNOMED           |
| 57676002  | Joint pain                                                     | SNOMED           |
| 49218002  | Hip pain                                                       | SNOMED           |
| 713413001 | Joint pain of pelvic region                                    | SNOMED           |
| 3.17E+14  | Pain in right knee                                             | SNOMED           |
| 3.17E+14  | Pain in left knee                                              | SNOMED           |
| 202482009 | Wrist joint pain                                               | SNOMED           |
| 202480001 | Elbow joint pain                                               | SNOMED           |
| 202472008 | Hand joint pain                                                | SNOMED           |
| 35678005  | Multiple joint pain                                            | SNOMED           |
| 91943004  | Arthralgia of temporomandibular joint                          | SNOMED           |
| 202479004 | Acromioclavicular joint pain                                   | SNOMED           |
| 1.13E+14  | Acute arthralgia of knee                                       | SNOMED           |
| 299447008 | Ankle joint - painful on movement                              | SNOMED           |
| 202490009 | Ankle joint pain                                               | SNOMED           |
| 239733006 | Anterior knee pain                                             | SNOMED           |
| 772826002 | Anti-cyclic citrullinated peptide antibody positive arthralgia | SNOMED           |
| 1.09E+15  | Anti-cyclic citrullinated peptide antibody positive arthralgia | SNOMED           |
| 1.59E+16  | Arthralgia assoc with cystic fibrosis                          | Nebraska Lexicon |
| 267952008 | Arthralgia of the pelvic region and thigh                      | SNOMED           |
| 267950000 | Arthralgia of the upper arm                                    | SNOMED           |
| 1.56E+16  | Bilateral acromioclavicular joint pain                         | SNOMED           |
| 1.22E+16  | Bilateral ankle joint pain                                     | SNOMED           |
| 1.24E+16  | Bilateral chronic pain following total hip arthroplasty        | SNOMED           |
| 1.22E+16  | Bilateral elbow joint pain                                     | SNOMED           |
| 1.22E+16  | Bilateral foot joint pain                                      | SNOMED           |
| 1.22E+16  | Bilateral hip joint pain                                       | SNOMED           |
| 1.19E+16  | Bilateral knee pain                                            | SNOMED           |
| 1.69E+16  | Bilateral pain of joint of hands                               | SNOMED           |

|           |                                                          |                  |
|-----------|----------------------------------------------------------|------------------|
| 1.56E+16  | Bilateral sacroiliac joint pain                          | SNOMED           |
| 1.22E+16  | Bilateral shoulder joint pain                            | SNOMED           |
| 1.56E+16  | Bilateral temporomandibular joint pain                   | SNOMED           |
| 1.59E+16  | Bilateral tenderness of temporomandibular joints         | SNOMED           |
| 1.24E+16  | Bilateral total knee chronic pain following arthroplasty | SNOMED           |
| 298253002 | Cervical facet joint pain                                | SNOMED           |
| 298478001 | Cervical spine painful on movement                       | SNOMED           |
| 736428003 | Chronic arthralgia of temporomandibular joint            | SNOMED           |
| 1.19E+16  | Chronic arthralgias of hips and knees                    | Nebraska Lexicon |
| 1.24E+16  | Chronic pain following left total hip arthroplasty       | SNOMED           |
| 1.24E+16  | Chronic pain following left total knee arthroplasty      | SNOMED           |
| 1.24E+16  | Chronic pain following right total hip arthroplasty      | SNOMED           |
| 1.24E+16  | Chronic pain following right total knee arthroplasty     | SNOMED           |
| 782661001 | Chronic sacroiliac joint pain                            | SNOMED           |
| 1.09E+15  | Chronic sacroiliac joint pain                            | SNOMED           |
| 7.58E+15  | Costal chondral thoracic pain                            | Nebraska Lexicon |
| 202485006 | Distal interphalangeal joint of finger pain              | SNOMED           |
| 202481002 | Distal radioulnar joint pain                             | SNOMED           |
| 298929004 | Elbow joint - painful on movement                        | SNOMED           |
| 247369005 | Facet joint pain                                         | SNOMED           |
| 299112005 | Finger joint painful on movement                         | SNOMED           |
| 202495004 | First metatarsophalangeal joint pain                     | SNOMED           |
| 299513007 | Foot joint - painful on movement                         | SNOMED           |
| 279066007 | Foot joint pain                                          | SNOMED           |
| 2.72E+16  | Forearm joint pain                                       | Nebraska Lexicon |
| 4.49E+14  | Herniation of lumbar intervertebral disc with sciatica   | SNOMED           |



|           |                                                                    |        |
|-----------|--------------------------------------------------------------------|--------|
| 299308007 | Hip joint painful on movement                                      | SNOMED |
| 736447000 | Infrequent episodic arthralgia of temporomandibular joint          | SNOMED |
| 202497007 | Interphalangeal joint of toe pain                                  | SNOMED |
| 1.08E+15  | Joint pain in left hand                                            | SNOMED |
| 1.08E+15  | Joint pain in right hand                                           | SNOMED |
| 299377003 | Knee joint painful on movement                                     | SNOMED |
| 202496003 | Lesser metatarsophalangeal joint pain                              | SNOMED |
| 46960006  | Lumbago-sciatica due to displacement of lumbar intervertebral disc | SNOMED |
| 279063004 | Lumbar facet joint pain                                            | SNOMED |
| 298674008 | Lumbar spine painful on movement                                   | SNOMED |
| 202483004 | Metacarpophalangeal joint pain                                     | SNOMED |
| 279067003 | Metatarsophalangeal joint pain                                     | SNOMED |
| 164539000 | O/E - joint movement painful                                       | SNOMED |
| 309765009 | Pain due to hip joint prosthesis                                   | SNOMED |
| 309767001 | Pain due to knee joint prosthesis                                  | SNOMED |
| 309768006 | Pain due to shoulder joint prosthesis                              | SNOMED |
| 1.22E+16  | Pain in left sacroiliac joint                                      | SNOMED |
| 3.17E+14  | Pain in right hip joint                                            | SNOMED |
| 1.22E+16  | Pain in right sacroiliac joint                                     | SNOMED |
| 433017009 | Pain in symphysis pubis in pregnancy                               | SNOMED |
| 1.57E+16  | Pain of bilateral sternoclavicular joints                          | SNOMED |
| 1.57E+16  | Pain of joint of bilateral lower legs                              | SNOMED |
| 1.08E+15  | Pain of joint of left foot                                         | SNOMED |
| 1.57E+16  | Pain of joint of left lower leg                                    | SNOMED |
| 1.08E+15  | Pain of joint of right foot                                        | SNOMED |
| 1.57E+16  | Pain of joint of right lower leg                                   | SNOMED |

|           |                                               |        |
|-----------|-----------------------------------------------|--------|
| 774137000 | Pain of left acromioclavicular joint          | SNOMED |
| 1.59E+16  | Pain of left ankle joint                      | SNOMED |
| 1.59E+16  | Pain of left elbow joint                      | SNOMED |
| 3.17E+14  | Pain of left hip joint                        | SNOMED |
| 1.59E+16  | Pain of left shoulder joint                   | SNOMED |
| 1.08E+15  | Pain of left sternoclavicular joint           | SNOMED |
| 1.22E+16  | Pain of left temporomandibular joint          | SNOMED |
| 774136009 | Pain of right acromioclavicular joint         | SNOMED |
| 1.59E+16  | Pain of right ankle joint                     | SNOMED |
| 1.59E+16  | Pain of right elbow joint                     | SNOMED |
| 1.59E+16  | Pain of right shoulder joint                  | SNOMED |
| 1.08E+15  | Pain of right sternoclavicular joint          | SNOMED |
| 1.22E+16  | Pain of right temporomandibular joint         | SNOMED |
| 298255009 | Pain on joint movement                        | SNOMED |
| 429531000 | Pain on passive stretch of joint              | SNOMED |
| 387638003 | Painful swelling of joint                     | SNOMED |
| 1.22E+16  | Patellofemoral syndrome of bilateral knees    | SNOMED |
| 1.08E+15  | Patellofemoral syndrome of left knee          | SNOMED |
| 1.08E+15  | Patellofemoral syndrome of right knee         | SNOMED |
| 703619001 | Pelvic girdle pain                            | SNOMED |
| 240271006 | Persistent prosthetic joint pain              | SNOMED |
| 202484005 | Proximal interphalangeal joint of finger pain | SNOMED |
| 277138006 | Rubella arthralgia                            | SNOMED |
| 202487003 | Sacroiliac joint pain                         | SNOMED |
| 298858000 | Shoulder joint - painful arc                  | SNOMED |
| 9.21E+14  | Shoulder joint painful on external rotation   | SNOMED |
| 298857005 | Shoulder joint painful on movement            | SNOMED |
| 202478007 | Sternoclavicular joint pain                   | SNOMED |
| 202491008 | Subtalar joint pain                           | SNOMED |

|           |                                                    |        |
|-----------|----------------------------------------------------|--------|
| 299554004 | Subtalar joint painful on movement                 | SNOMED |
| 202493006 | Talonavicular joint pain                           | SNOMED |
| 298376001 | Temporomandibular joint painful on movement        | SNOMED |
| 299446004 | Tenderness of ankle joint                          | SNOMED |
| 298928007 | Tenderness of elbow joint                          | SNOMED |
| 299111003 | Tenderness of finger joint                         | SNOMED |
| 299512002 | Tenderness of foot joint                           | SNOMED |
| 299307002 | Tenderness of hip joint                            | SNOMED |
| 110288007 | Tenderness of joint                                | SNOMED |
| 299372009 | Tenderness of knee joint                           | SNOMED |
| 1.22E+16  | Tenderness of left temporomandibular joint         | SNOMED |
| 1.22E+16  | Tenderness of right temporomandibular joint        | SNOMED |
| 298251000 | Tenderness of sacroiliac joint                     | SNOMED |
| 298856001 | Tenderness of shoulder joint                       | SNOMED |
| 299553005 | Tenderness of subtalar joint                       | SNOMED |
| 298375002 | Tenderness of temporomandibular joint              | SNOMED |
| 109659002 | Tenderness of temporomandibular joint on palpation | SNOMED |
| 299198008 | Tenderness of thumb joint                          | SNOMED |
| 299632005 | Tenderness of toe joint                            | SNOMED |
| 299017002 | Tenderness of wrist joint                          | SNOMED |
| 298254008 | Thoracic facet joint pain                          | SNOMED |
| 298579007 | Thoracic spine - painful on movement               | SNOMED |
| 299199000 | Thumb joint painful on movement                    | SNOMED |
| 202489000 | Tibiofibular joint pain                            | SNOMED |
| 299633000 | Toe joint painful on movement                      | SNOMED |
| 8.74E+13  | Vertebral joint pain                               | SNOMED |
| 299018007 | Wrist joint painful on movement                    | SNOMED |

Lung Disorder

Any descendant of SNOMED-CT 19829001 ("Disorder of Lung").

Malaise or Fatigue

| Code      | Name                              | Vocabulary |
|-----------|-----------------------------------|------------|
| 367391008 | Malaise                           | SNOMED     |
| 84229001  | Fatigue                           | SNOMED     |
| 780.79    | Other malaise and fatigue         | ICD9CM     |
| 13791008  | Asthenia                          | SNOMED     |
| 52702003  | Chronic fatigue syndrome          | SNOMED     |
| 271795006 | Malaise and fatigue               | SNOMED     |
| 780.7     | Malaise and fatigue               | ICD9CM     |
| 1.13E+12  | Asthenia due to disease           | SNOMED     |
| 248278004 | Attacks of weakness               | SNOMED     |
| 1.56E+16  | Bilateral weakness of upper limbs | SNOMED     |
| 161874006 | Heavy feeling                     | SNOMED     |
| 161873000 | Heavy legs                        | SNOMED     |
| R53       | Malaise and fatigue               | ICD10CM    |
| 3.77E+14  | Mild chronic fatigue syndrome     | SNOMED     |
| 3.77E+14  | Moderate chronic fatigue syndrome | SNOMED     |
| 713568000 | Occasionally tired                | SNOMED     |
| R53.8     | Other malaise and fatigue         | ICD10CM    |
| 442099003 | Psychogenic fatigue               | SNOMED     |
| 373931001 | Sensation of heaviness in limbs   | SNOMED     |
| 3.77E+14  | Severe chronic fatigue syndrome   | SNOMED     |
| 224960004 | Tired                             | SNOMED     |
| 267032009 | Tired all the time                | SNOMED     |
| 248269005 | Tired on least exertion           | SNOMED     |

#### Mood Changes

| Code      | Name                                                                       | Vocabulary |
|-----------|----------------------------------------------------------------------------|------------|
| 78667006  | Dysthymia                                                                  | SNOMED     |
| 274646000 | Irritability and anger                                                     | SNOMED     |
| 2506003   | Early onset dysthymia                                                      | SNOMED     |
| 87842000  | Generalized neuromuscular exhaustion syndrome                              | SNOMED     |
| 19694002  | Late onset dysthymia                                                       | SNOMED     |
| 724733005 | Oppositional defiant disorder co-occurrent with chronic irritability-anger | SNOMED     |

|           |                                                                                                           |        |
|-----------|-----------------------------------------------------------------------------------------------------------|--------|
| 724734004 | Oppositional defiant disorder co-occurrent with chronic irritability-anger with normal prosocial emotions | SNOMED |
| 83176005  | Primary dysthymia                                                                                         | SNOMED |
| 38451003  | Primary dysthymia early onset                                                                             | SNOMED |
| 67711008  | Primary dysthymia late onset                                                                              | SNOMED |
| 85080004  | Secondary dysthymia                                                                                       | SNOMED |
| 3109008   | Secondary dysthymia early onset                                                                           | SNOMED |
| 36170009  | Secondary dysthymia late onset                                                                            | SNOMED |

### Myalgias

| Code      | Name                                          | Vocabulary |
|-----------|-----------------------------------------------|------------|
| 68962001  | Muscle pain                                   | SNOMED     |
| 83264000  | Epidemic pleurodynia                          | SNOMED     |
| 95416007  | Eosinophilia myalgia syndrome                 | SNOMED     |
| 9.57E+14  | Secondary fibromyalgia                        | SNOMED     |
| 702549002 | Centrally mediated myalgia                    | SNOMED     |
| 2.82E+13  | Abdominal muscle pain                         | SNOMED     |
| 699682009 | Localized masticatory muscle soreness         | SNOMED     |
| 726531007 | Myofascial pain syndrome                      | SNOMED     |
| 712752004 | Myalgia of pelvic floor                       | SNOMED     |
| 1.65E+16  | Myalgia caused by statin                      | SNOMED     |
| 1.14E+14  | Myofascial pain syndrome of lumbar spine      | SNOMED     |
| 4.13E+13  | Myofascial pain syndrome of thoracic spine    | SNOMED     |
| 240044003 | Fibrositis and nodular fasciitis              | SNOMED     |
| 240107001 | Viral myalgia                                 | SNOMED     |
| 95415006  | Polymyalgia                                   | SNOMED     |
| 22166009  | Skeletal muscle tender                        | SNOMED     |
| 95421005  | Intercostal myalgia                           | SNOMED     |
| 95417003  | Primary fibromyalgia syndrome                 | SNOMED     |
| 85879003  | Secondary fibrositis                          | SNOMED     |
| 403735006 | Eosinophilia-myalgia syndrome from tryptophan | SNOMED     |

|           |                                                |                  |
|-----------|------------------------------------------------|------------------|
| 76821002  | Epidemic cervical myalgia                      | SNOMED           |
| 54981004  | Charleyhorse                                   | SNOMED           |
| 298292009 | Pain on movement of skeletal muscle            | SNOMED           |
| 298289005 | Muscle tender point                            | SNOMED           |
| 298290001 | Tenderness at muscle insertion                 | SNOMED           |
| 298288002 | Diffuse muscle tenderness                      | SNOMED           |
| 279030006 | Myofascial pain syndrome of neck               | SNOMED           |
| 279070004 | Muscle tension pain                            | SNOMED           |
| 30173002  | Primary fibrositis                             | SNOMED           |
| 279036000 | Myofascial pain syndrome of thorax             | SNOMED           |
| 279041008 | Myofascial pain syndrome of lower back         | SNOMED           |
| 288232008 | Myalgia/myositis - ankle/foot                  | SNOMED           |
| 288231001 | Myalgia/myositis - lower leg                   | SNOMED           |
| 288228002 | Myalgia/myositis - forearm                     | SNOMED           |
| 288225004 | Myalgia/myositis - multiple                    | SNOMED           |
| 288230000 | Myalgia/myositis - pelvis/thigh                | SNOMED           |
| 288229005 | Myalgia/myositis - hand                        | SNOMED           |
| 288227007 | Myalgia/myositis - upper arm                   | SNOMED           |
| 288226003 | Myalgia/myositis - shoulder                    | SNOMED           |
| 6.43E+15  | Muscle pain with chewing                       | Nebraska Lexicon |
| 8.19E+15  | Pain in the rhomboid muscle                    | Nebraska Lexicon |
| 3.01E+14  | Repetitive strain injury of right thigh        | SNOMED           |
| 3.01E+14  | Repetitive strain injury of right foot         | SNOMED           |
| 3.01E+14  | Repetitive strain injury of right ankle        | SNOMED           |
| 3.01E+14  | Repetitive strain injury of left thigh         | SNOMED           |
| 3.01E+14  | Repetitive strain injury of left foot          | SNOMED           |
| 3.01E+14  | Repetitive strain injury of left ankle         | SNOMED           |
| 1.57E+16  | Repetitive strain injury of bilateral forearms | SNOMED           |
| 1.57E+16  | Repetitive strain injury of bilateral hands    | SNOMED           |

|          |            |        |
|----------|------------|--------|
| 56557000 | Fibrositis | SNOMED |
|----------|------------|--------|

#### Myocarditis

| Code      | Name                                               | Vocabulary |
|-----------|----------------------------------------------------|------------|
| 50920009  | Myocarditis                                        | SNOMED     |
| 46701001  | Acute myocarditis                                  | SNOMED     |
| 195033009 | Sarcoid heart muscle disease                       | SNOMED     |
| 91025000  | Idiopathic myocarditis                             | SNOMED     |
| 266238009 | Isolated (Fiedler's) myocarditis                   | SNOMED     |
| 89141000  | Viral myocarditis                                  | SNOMED     |
| 22653005  | Myocarditis due to infectious agent                | SNOMED     |
| 194942007 | Acute myocarditis associated with another disorder | SNOMED     |
| 64043005  | Bacterial myocarditis                              | SNOMED     |
| 194750008 | Rheumatic myocarditis                              | SNOMED     |
| 37217002  | Coxsackie myocarditis                              | SNOMED     |
| 194709000 | Acute rheumatic myocarditis                        | SNOMED     |
| 76534005  | Myocarditis due to acquired toxoplasmosis          | SNOMED     |
| 31993003  | Toxic myocarditis                                  | SNOMED     |
| 194943002 | Acute aseptic myocarditis of the newborn           | SNOMED     |
| 194944008 | Acute myocarditis - coxsackie                      | SNOMED     |
| 194945009 | Acute myocarditis - diphtheritic                   | SNOMED     |
| 194946005 | Acute myocarditis - influenzal                     | SNOMED     |
| 194950003 | Acute myocarditis - meningococcal                  | SNOMED     |
| 194947001 | Acute myocarditis - syphilitic                     | SNOMED     |
| 194948006 | Acute myocarditis - toxoplasmosis                  | SNOMED     |
| 194949003 | Acute myocarditis - tuberculous                    | SNOMED     |
| 30328003  | Acute myoendocarditis                              | SNOMED     |
| 11176009  | Acute myopericarditis                              | SNOMED     |
| 65718001  | Adenoviral myocarditis                             | SNOMED     |
| 45093008  | Chronic interstitial myocarditis                   | SNOMED     |
| 4.51E+14  | Chronic myocarditis                                | SNOMED     |

|           |                                                                      |        |
|-----------|----------------------------------------------------------------------|--------|
| 61012002  | Chronic rheumatic heart disease with myocarditis                     | SNOMED |
| 756003    | Chronic rheumatic myopericarditis                                    | SNOMED |
| 413933004 | Coxsackie myocarditis of newborn                                     | SNOMED |
| 26117009  | Diphtheritic myocarditis                                             | SNOMED |
| 427372006 | Eosinophilic myocarditis                                             | SNOMED |
| 472707009 | Fetal myocarditis                                                    | SNOMED |
| 488007    | Fibroid myocarditis                                                  | SNOMED |
| 233868005 | Fungal myocarditis                                                   | SNOMED |
| 60812006  | Giant cell myocarditis                                               | SNOMED |
| 723865005 | Infection causing myoendocarditis                                    | SNOMED |
| 471841009 | Inflammatory cardiomyopathy                                          | SNOMED |
| 37925008  | Interstitial myocarditis                                             | SNOMED |
| 55482007  | Isolated diffuse granulomatous myocarditis                           | SNOMED |
| 427443009 | Lymphocytic myocarditis                                              | SNOMED |
| 74918002  | Measles myocarditis                                                  | SNOMED |
| 91468009  | Meningococcal myocarditis                                            | SNOMED |
| 63462008  | Mumps myocarditis                                                    | SNOMED |
| 421929001 | Myocarditis associated with AIDS                                     | SNOMED |
| 1.24E+15  | Myocarditis caused by 2019 novel coronavirus                         | SNOMED |
| 713318009 | Myocarditis co-occurrent with human immunodeficiency virus infection | SNOMED |
| 55087008  | Myocarditis due to chemical agent                                    | SNOMED |
| 72527006  | Myocarditis due to drug                                              | SNOMED |
| 460345001 | Myocarditis due to echovirus                                         | SNOMED |
| 460338001 | Myocarditis due to Genus Aspergillus                                 | SNOMED |
| 460620006 | Myocarditis due to Genus Borrelia                                    | SNOMED |
| 460329003 | Myocarditis due to Genus Candida                                     | SNOMED |
| 460317007 | Myocarditis due to Genus Rickettsia                                  | SNOMED |



|           |                                                   |        |
|-----------|---------------------------------------------------|--------|
| 8676001   | Myocarditis due to hypersensitivity state         | SNOMED |
| 1.06E+16  | Myocarditis due to Influenza A virus              | SNOMED |
| 1.43E+14  | Myocarditis due to Influenza A virus subtype H1N1 | SNOMED |
| 78046005  | Myocarditis due to influenza virus                | SNOMED |
| 460352004 | Myocarditis due to Order Spirochaetales           | SNOMED |
| 79096004  | Myocarditis due to physical agent                 | SNOMED |
| 88782004  | Myocarditis due to radiation                      | SNOMED |
| 1.09E+15  | Myocarditis due to scarlet fever                  | SNOMED |
| 723863003 | Myopericarditis                                   | SNOMED |
| 1.60E+16  | Myopericarditis caused by Borrelia species        | SNOMED |
| 233869002 | Parasitic myocarditis                             | SNOMED |
| 233867000 | Q fever myocarditis                               | SNOMED |
| 28880005  | Rheumatoid carditis                               | SNOMED |
| 195136004 | Rheumatoid myocarditis                            | SNOMED |
| 64190005  | Rubella myocarditis                               | SNOMED |
| 279001    | Senile myocarditis                                | SNOMED |
| 194956009 | Septic myocarditis - pneumococcal                 | SNOMED |
| 194957000 | Septic myocarditis - staphylococcal               | SNOMED |
| 194958005 | Septic myocarditis - streptococcal                | SNOMED |
| 18484008  | Subacute interstitial myocarditis                 | SNOMED |
| 421272004 | Subacute myocarditis associated with AIDS         | SNOMED |
| 69589006  | Subacute myoendocarditis                          | SNOMED |
| 4082005   | Syphilitic myocarditis                            | SNOMED |
| 187195003 | Toxoplasma myocarditis                            | SNOMED |
| 47292005  | Tuberculosis of myocardium                        | SNOMED |

SARS-CoV-2 Positive Test

SNOMED 1240580000000000 ("2019 novel coronavirus detected")

SARS-CoV-2 Test Measurements

| Code    | Name                                                                                     | Vocabulary |
|---------|------------------------------------------------------------------------------------------|------------|
| 94500-6 | SARS-CoV-2 (COVID-19) RNA [Presence] in Respiratory specimen by NAA with probe detection | LOINC      |
| 94547-7 | SARS-CoV-2 (COVID-19) IgG+IgM Ab [Presence] in Serum or Plasma by Immunoassay            | LOINC      |
| 94563-4 | SARS-CoV-2 (COVID-19) IgG Ab [Presence] in Serum or Plasma by Immunoassay                | LOINC      |
| 94564-2 | SARS-CoV-2 (COVID-19) IgM Ab [Presence] in Serum or Plasma by Immunoassay                | LOINC      |
| 94762-2 | SARS-CoV-2 (COVID-19) Ab [Presence] in Serum or Plasma by Immunoassay                    | LOINC      |
| 94558-4 | SARS-CoV-2 (COVID-19) Ag [Presence] in Respiratory specimen by Rapid immunoassay         | LOINC      |
| 94507-1 | SARS-CoV-2 (COVID-19) IgG Ab [Presence] in Serum, Plasma or Blood by Rapid immunoassay   | LOINC      |
| 94562-6 | SARS-CoV-2 (COVID-19) IgA Ab [Presence] in Serum or Plasma by Immunoassay                | LOINC      |
| 94508-9 | SARS-CoV-2 (COVID-19) IgM Ab [Presence] in Serum, Plasma or Blood by Rapid immunoassay   | LOINC      |
| 94505-5 | SARS-CoV-2 (COVID-19) IgG Ab [Units/volume] in Serum or Plasma by Immunoassay            | LOINC      |
| 94506-3 | SARS-CoV-2 (COVID-19) IgM Ab [Units/volume] in Serum or Plasma by Immunoassay            | LOINC      |
| U0002   | 2019-ncov coronavirus, sars-cov-2/2019-ncov (covid-19), any technique, multiple types    | HCPCS      |

|          |                                                                                                                                                                                                                                              |        |
|----------|----------------------------------------------------------------------------------------------------------------------------------------------------------------------------------------------------------------------------------------------|--------|
|          | or subtypes (includes all targets), non-cdc                                                                                                                                                                                                  |        |
| 0224U    | Antibody, severe acute respiratory syndrome coronavirus 2 (SARS-CoV-2) (Coronavirus disease [COVID-19]), includes titer(s), when performed                                                                                                   | CPT4   |
| U0001    | Cdc 2019 novel coronavirus (2019-ncov) real-time rt-pcr diagnostic panel                                                                                                                                                                     | HCPCS  |
| 1.24E+15 | Detection of 2019 novel coronavirus using polymerase chain reaction technique                                                                                                                                                                | SNOMED |
| 86328    | Immunoassay for infectious agent antibody(ies), qualitative or semiquantitative, single step method (eg, reagent strip); severe acute respiratory syndrome coronavirus 2 (SARS-CoV-2) (Coronavirus disease [COVID-19])                       | CPT4   |
| 87635    | Infectious agent detection by nucleic acid (DNA or RNA); severe acute respiratory syndrome coronavirus 2 (SARS-CoV-2) (Coronavirus disease [COVID-19]), amplified probe technique                                                            | CPT4   |
| 0202U    | Infectious disease (bacterial or viral respiratory tract infection), pathogen-specific nucleic acid (DNA or RNA), 22 targets including severe acute respiratory syndrome coronavirus 2 (SARS-CoV-2), qualitative RT-PCR, nasopharyngeal swab | CPT4   |
| 0223U    | Infectious disease (bacterial or viral respiratory tract infection), pathogen-specific                                                                                                                                                       | CPT4   |

|             |                                                                                                                                                       |                |
|-------------|-------------------------------------------------------------------------------------------------------------------------------------------------------|----------------|
|             | nucleic acid (DNA or RNA), 22 targets including severe acute respiratory syndrome coronavirus 2 (SARS-CoV-2), qualitative RT-PCR, nasopharyngeal swab |                |
| 95380-2     | Influenza virus A and B and SARS-CoV-2 (COVID-19) and SARS-related CoV RNA panel - Respiratory specimen by NAA with probe detection                   | LOINC          |
| 95423-0     | Influenza virus A and B and SARS-CoV-2 (COVID-19) identified in Respiratory specimen by NAA with probe detection                                      | LOINC          |
| 95422-2     | Influenza virus A and B RNA and SARS-CoV-2 (COVID-19) N gene panel - Respiratory specimen by NAA with probe detection                                 | LOINC          |
| 1.24E+15    | Measurement of 2019 novel coronavirus antibody                                                                                                        | SNOMED         |
| 1.24E+15    | Measurement of 2019 novel coronavirus antigen                                                                                                         | SNOMED         |
| OMOP4873969 | Measurement of Severe acute respiratory syndrome coronavirus 2 (SARS-CoV-2)                                                                           | OMOP Extension |
| OMOP4912985 | Measurement of Severe acute respiratory syndrome coronavirus 2 (SARS-CoV-2) Genetic material using Molecular method                                   | OMOP Extension |
| OMOP4912972 | Measurement of Severe acute respiratory syndrome coronavirus 2 (SARS-CoV-2) in Blood                                                                  | OMOP Extension |
| OMOP4873967 | Measurement of Severe acute respiratory syndrome coronavirus 2 (SARS-CoV-2) in Respiratory specimen                                                   | OMOP Extension |
| OMOP4912984 | Measurement of Severe acute respiratory syndrome                                                                                                      | OMOP Extension |

|             |                                                                                                                                                               |                |
|-------------|---------------------------------------------------------------------------------------------------------------------------------------------------------------|----------------|
|             | coronavirus 2 (SARS-CoV-2)<br>in Saliva                                                                                                                       |                |
| OMOP4912993 | Measurement of Severe<br>acute respiratory syndrome<br>coronavirus 2 (SARS-CoV-2)<br>in Sample from nose                                                      | OMOP Extension |
| OMOP4912986 | Measurement of Severe<br>acute respiratory syndrome<br>coronavirus 2 (SARS-CoV-2)<br>in Specified specimen                                                    | OMOP Extension |
| OMOP4873966 | Measurement of Severe<br>acute respiratory syndrome<br>coronavirus 2 (SARS-CoV-2)<br>in Unspecified specimen                                                  | OMOP Extension |
| OMOP4912974 | Measurement of Severe<br>acute respiratory syndrome<br>coronavirus 2 (SARS-CoV-2)<br>using Culture method                                                     | OMOP Extension |
| OMOP4912982 | Measurement of Severe<br>acute respiratory syndrome<br>coronavirus 2 (SARS-CoV-2)<br>using Nucleic acid<br>amplification technique                            | OMOP Extension |
| OMOP4912973 | Measurement of Severe<br>acute respiratory syndrome<br>coronavirus 2 (SARS-CoV-2)<br>using Nucleic acid<br>amplification technique in<br>Blood                | OMOP Extension |
| OMOP4873965 | Measurement of Severe<br>acute respiratory syndrome<br>coronavirus 2 (SARS-CoV-2)<br>using Nucleic acid<br>amplification technique in<br>Respiratory specimen | OMOP Extension |
| OMOP4912983 | Measurement of Severe<br>acute respiratory syndrome<br>coronavirus 2 (SARS-CoV-2)<br>using Nucleic acid<br>amplification technique in<br>Saliva               | OMOP Extension |
| OMOP4912992 | Measurement of Severe<br>acute respiratory syndrome                                                                                                           | OMOP Extension |

|             |                                                                                                                                                |                |
|-------------|------------------------------------------------------------------------------------------------------------------------------------------------|----------------|
|             | coronavirus 2 (SARS-CoV-2) using Nucleic acid amplification technique in Sample from nose                                                      |                |
| OMOP4873968 | Measurement of Severe acute respiratory syndrome coronavirus 2 (SARS-CoV-2) using Nucleic acid amplification technique in Unspecified specimen | OMOP Extension |
| OMOP4912975 | Measurement of Severe acute respiratory syndrome coronavirus 2 (SARS-CoV-2) using Sequencing                                                   | OMOP Extension |
| 94763-0     | SARS-CoV-2 (COVID-19) [Presence] in Unspecified specimen by Organism specific culture                                                          | LOINC          |
| 94661-6     | SARS-CoV-2 (COVID-19) Ab [Interpretation] in Serum or Plasma                                                                                   | LOINC          |
| 94769-7     | SARS-CoV-2 (COVID-19) Ab [Units/volume] in Serum or Plasma by Immunoassay                                                                      | LOINC          |
| 94504-8     | SARS-CoV-2 (COVID-19) Ab panel - Serum or Plasma by Immunoassay                                                                                | LOINC          |
| 94503-0     | SARS-CoV-2 (COVID-19) Ab panel - Serum, Plasma or Blood by Rapid immunoassay                                                                   | LOINC          |
| 94768-9     | SARS-CoV-2 (COVID-19) IgA Ab [Presence] in Serum, Plasma or Blood by Rapid immunoassay                                                         | LOINC          |
| 94720-0     | SARS-CoV-2 (COVID-19) IgA Ab [Units/volume] in Serum or Plasma by Immunoassay                                                                  | LOINC          |
| 95125-1     | SARS-CoV-2 (COVID-19) IgA+IgM [Presence] in Serum or Plasma by Immunoassay                                                                     | LOINC          |
| 94761-4     | SARS-CoV-2 (COVID-19) IgG Ab [Presence] in DBS by Immunoassay                                                                                  | LOINC          |

|         |                                                                                                                                      |       |
|---------|--------------------------------------------------------------------------------------------------------------------------------------|-------|
| 95416-4 | SARS-CoV-2 (COVID-19) IgM Ab [Presence] in DBS by Immunoassay                                                                        | LOINC |
| 94510-5 | SARS-CoV-2 (COVID-19) N gene [Cycle Threshold #] in Unspecified specimen by NAA with probe detection                                 | LOINC |
| 94311-8 | SARS-CoV-2 (COVID-19) N gene [Cycle Threshold #] in Unspecified specimen by Nucleic acid amplification using CDC primer-probe set N1 | LOINC |
| 94312-6 | SARS-CoV-2 (COVID-19) N gene [Cycle Threshold #] in Unspecified specimen by Nucleic acid amplification using CDC primer-probe set N2 | LOINC |
| 94760-6 | SARS-CoV-2 (COVID-19) N gene [Presence] in Nasopharynx by NAA with probe detection                                                   | LOINC |
| 95409-9 | SARS-CoV-2 (COVID-19) N gene [Presence] in Nose by NAA with probe detection                                                          | LOINC |
| 94533-7 | SARS-CoV-2 (COVID-19) N gene [Presence] in Respiratory specimen by NAA with probe detection                                          | LOINC |
| 94756-4 | SARS-CoV-2 (COVID-19) N gene [Presence] in Respiratory specimen by Nucleic acid amplification using CDC primer-probe set N1          | LOINC |
| 94757-2 | SARS-CoV-2 (COVID-19) N gene [Presence] in Respiratory specimen by Nucleic acid amplification using CDC primer-probe set N2          | LOINC |

|         |                                                                                                                             |       |
|---------|-----------------------------------------------------------------------------------------------------------------------------|-------|
| 95425-5 | SARS-CoV-2 (COVID-19) N gene [Presence] in Saliva (oral fluid) by NAA with probe detection                                  | LOINC |
| 94766-3 | SARS-CoV-2 (COVID-19) N gene [Presence] in Serum or Plasma by NAA with probe detection                                      | LOINC |
| 94316-7 | SARS-CoV-2 (COVID-19) N gene [Presence] in Unspecified specimen by NAA with probe detection                                 | LOINC |
| 94307-6 | SARS-CoV-2 (COVID-19) N gene [Presence] in Unspecified specimen by Nucleic acid amplification using CDC primer-probe set N1 | LOINC |
| 94308-4 | SARS-CoV-2 (COVID-19) N gene [Presence] in Unspecified specimen by Nucleic acid amplification using CDC primer-probe set N2 | LOINC |
| 95411-5 | SARS-CoV-2 (COVID-19) neutralizing antibody [Presence] in Serum by pVNT                                                     | LOINC |
| 95410-7 | SARS-CoV-2 (COVID-19) neutralizing antibody [Titer] in Serum by pVNT                                                        | LOINC |
| 94644-2 | SARS-CoV-2 (COVID-19) ORF1ab region [Cycle Threshold #] in Respiratory specimen by NAA with probe detection                 | LOINC |
| 94511-3 | SARS-CoV-2 (COVID-19) ORF1ab region [Cycle Threshold #] in Unspecified specimen by NAA with probe detection                 | LOINC |
| 94559-2 | SARS-CoV-2 (COVID-19) ORF1ab region [Presence] in                                                                           | LOINC |



|         |                                                                                                           |       |
|---------|-----------------------------------------------------------------------------------------------------------|-------|
|         | Respiratory specimen by NAA with probe detection                                                          |       |
| 94639-2 | SARS-CoV-2 (COVID-19) ORF1ab region [Presence] in Unspecified specimen by NAA with probe detection        | LOINC |
| 94646-7 | SARS-CoV-2 (COVID-19) RdRp gene [Cycle Threshold #] in Respiratory specimen by NAA with probe detection   | LOINC |
| 94645-9 | SARS-CoV-2 (COVID-19) RdRp gene [Cycle Threshold #] in Unspecified specimen by NAA with probe detection   | LOINC |
| 94534-5 | SARS-CoV-2 (COVID-19) RdRp gene [Presence] in Respiratory specimen by NAA with probe detection            | LOINC |
| 94314-2 | SARS-CoV-2 (COVID-19) RdRp gene [Presence] in Unspecified specimen by NAA with probe detection            | LOINC |
| 94745-7 | SARS-CoV-2 (COVID-19) RNA [Cycle Threshold #] in Respiratory specimen by NAA with probe detection         | LOINC |
| 94746-5 | SARS-CoV-2 (COVID-19) RNA [Cycle Threshold #] in Unspecified specimen by NAA with probe detection         | LOINC |
| 94819-0 | SARS-CoV-2 (COVID-19) RNA [Log #/volume] (viral load) in Unspecified specimen by NAA with probe detection | LOINC |
| 94565-9 | SARS-CoV-2 (COVID-19) RNA [Presence] in Nasopharynx by NAA with non-probe detection                       | LOINC |
| 94759-8 | SARS-CoV-2 (COVID-19) RNA [Presence] in Nasopharynx by NAA with probe detection                           | LOINC |

|         |                                                                                                      |       |
|---------|------------------------------------------------------------------------------------------------------|-------|
| 95406-5 | SARS-CoV-2 (COVID-19) RNA [Presence] in Nose by NAA with probe detection                             | LOINC |
| 95424-8 | SARS-CoV-2 (COVID-19) RNA [Presence] in Respiratory specimen by Sequencing                           | LOINC |
| 94845-5 | SARS-CoV-2 (COVID-19) RNA [Presence] in Saliva (oral fluid) by NAA with probe detection              | LOINC |
| 94822-4 | SARS-CoV-2 (COVID-19) RNA [Presence] in Saliva (oral fluid) by Sequencing                            | LOINC |
| 94660-8 | SARS-CoV-2 (COVID-19) RNA [Presence] in Serum or Plasma by NAA with probe detection                  | LOINC |
| 94309-2 | SARS-CoV-2 (COVID-19) RNA [Presence] in Unspecified specimen by NAA with probe detection             | LOINC |
| 94531-1 | SARS-CoV-2 (COVID-19) RNA panel - Respiratory specimen by NAA with probe detection                   | LOINC |
| 94306-8 | SARS-CoV-2 (COVID-19) RNA panel - Unspecified specimen by NAA with probe detection                   | LOINC |
| 94642-6 | SARS-CoV-2 (COVID-19) S gene [Cycle Threshold #] in Respiratory specimen by NAA with probe detection | LOINC |
| 94643-4 | SARS-CoV-2 (COVID-19) S gene [Cycle Threshold #] in Unspecified specimen by NAA with probe detection | LOINC |
| 94640-0 | SARS-CoV-2 (COVID-19) S gene [Presence] in Respiratory specimen by NAA with probe detection          | LOINC |
| 94767-1 | SARS-CoV-2 (COVID-19) S gene [Presence] in Serum or Plasma by NAA with probe detection               | LOINC |

|         |                                                                                                         |       |
|---------|---------------------------------------------------------------------------------------------------------|-------|
| 94641-8 | SARS-CoV-2 (COVID-19) S gene [Presence] in Unspecified specimen by NAA with probe detection             | LOINC |
| 94764-8 | SARS-CoV-2 (COVID-19) whole genome [Nucleotide sequence] in Isolate by Sequencing                       | LOINC |
| 94313-4 | SARS-like coronavirus N gene [Cycle Threshold #] in Unspecified specimen by NAA with probe detection    | LOINC |
| 94310-0 | SARS-like coronavirus N gene [Presence] in Unspecified specimen by NAA with probe detection             | LOINC |
| 94509-7 | SARS-related coronavirus E gene [Cycle Threshold #] in Unspecified specimen by NAA with probe detection | LOINC |
| 94758-0 | SARS-related coronavirus E gene [Presence] in Respiratory specimen by NAA with probe detection          | LOINC |
| 94765-5 | SARS-related coronavirus E gene [Presence] in Serum or Plasma by NAA with probe detection               | LOINC |
| 94315-9 | SARS-related coronavirus E gene [Presence] in Unspecified specimen by NAA with probe detection          | LOINC |
| 94502-2 | SARS-related coronavirus RNA [Presence] in Respiratory specimen by NAA with probe detection             | LOINC |
| 94647-5 | SARS-related coronavirus RNA [Presence] in Unspecified specimen by NAA with probe detection             | LOINC |
| 94532-9 | SARS-related coronavirus+MERS coronavirus RNA [Presence]                                                | LOINC |

|  |                                                     |  |
|--|-----------------------------------------------------|--|
|  | in Respiratory specimen by NAA with probe detection |  |
|--|-----------------------------------------------------|--|

## Sleep Disorder

| Code      | Name                                                              | Vocabulary |
|-----------|-------------------------------------------------------------------|------------|
| 193462001 | Insomnia                                                          | SNOMED     |
| 39898005  | Sleep disorder                                                    | SNOMED     |
| 77692006  | Hypersomnia                                                       | SNOMED     |
| 44186003  | Dyssomnia                                                         | SNOMED     |
| 3972004   | Primary insomnia                                                  | SNOMED     |
| 425832009 | Psychophysilogic insomnia                                         | SNOMED     |
| 248256006 | Not getting enough sleep                                          | SNOMED     |
| 9.15E+13  | Narcolepsy without cataplexy                                      | SNOMED     |
| 194437008 | Disorders of initiating and maintaining sleep                     | SNOMED     |
| 81608000  | Insomnia disorder related to known organic factor                 | SNOMED     |
| 415238003 | REM sleep behavior disorder                                       | SNOMED     |
| 271794005 | Disorder of sleep-wake cycle                                      | SNOMED     |
| 80623000  | Sleep-wake schedule disorder, delayed phase type                  | SNOMED     |
| 193042000 | Cataplexy and narcolepsy                                          | SNOMED     |
| 24121004  | Insomnia disorder related to another mental disorder              | SNOMED     |
| 472819006 | Adjustment insomnia                                               | SNOMED     |
| 441910000 | Idiopathic sleep related non-obstructive alveolar hypoventilation | SNOMED     |
| 270487001 | Non-organic sleep disorder                                        | SNOMED     |
| 58690002  | Parasomnia                                                        | SNOMED     |
| 442416002 | Idiopathic hypersomnia associated with long sleep time            | SNOMED     |
| 442176004 | Sleep dysfunction with arousal disturbance                        | SNOMED     |
| 399040002 | Congenital central hypoventilation                                | SNOMED     |
| 8.99E+13  | Sleep related hypoventilation or hypoxemia                        | SNOMED     |
| 89675003  | Sleep terror disorder                                             | SNOMED     |

|           |                                                                |        |
|-----------|----------------------------------------------------------------|--------|
| 80495009  | Sleep walking disorder                                         | SNOMED |
| 418475009 | Drug-induced sleep disorder                                    | SNOMED |
| 713498009 | Circadian rhythm sleep disorder of shift work type             | SNOMED |
| 443760008 | Sleep hypoventilation                                          | SNOMED |
| 430893009 | Sleep related rhythmic movement disorder                       | SNOMED |
| 9.04E+13  | Behavioral insomnia of childhood                               | SNOMED |
| 268722008 | Non-organic disorder of the sleep-wake schedule                | SNOMED |
| 274950005 | Sleep related bruxism                                          | SNOMED |
| 271793004 | Irregular sleep-wake pattern                                   | SNOMED |
| 442292004 | Idiopathic hypersomnia without long sleep time                 | SNOMED |
| 2.80E+13  | Insomnia co-occurrent and due to medical condition             | SNOMED |
| 192454004 | Nonorganic insomnia                                            | SNOMED |
| 31537005  | Sleep-wake schedule disorder, advanced phase type              | SNOMED |
| 41083005  | Alcohol-induced sleep disorder                                 | SNOMED |
| 441830002 | Confusional arousal disorder                                   | SNOMED |
| 426451004 | Recurrent hypersomnia                                          | SNOMED |
| 442120007 | Recurrent isolated sleep paralysis                             | SNOMED |
| 2.88E+14  | Behavioral insomnia of childhood, sleep onset association type | SNOMED |
| 441976002 | Organic parasomnia                                             | SNOMED |
| 268654005 | Repetitive intrusions of sleep                                 | SNOMED |
| 230496009 | Non-24 hour sleep-wake cycle                                   | SNOMED |
| 2.88E+14  | Behavioral insomnia of childhood, limit setting type           | SNOMED |
| 89415002  | Hypersomnia disorder related to another mental disorder        | SNOMED |
| 9.00E+13  | Organic sleep related movement disorder                        | SNOMED |
| 36124002  | Primary hypersomnia                                            | SNOMED |

|           |                                                                        |        |
|-----------|------------------------------------------------------------------------|--------|
| 44455001  | Hypersomnia disorder related to a known organic factor                 | SNOMED |
| 2.88E+14  | Behavioral insomnia of childhood, combined type                        | SNOMED |
| 418955009 | Organic sleep disorder                                                 | SNOMED |
| 57588009  | Sedative, hypnotic AND/OR anxiolytic-induced sleep disorder            | SNOMED |
| 88926005  | Opioid-induced sleep disorder                                          | SNOMED |
| 22574000  | Cocaine-induced sleep disorder                                         | SNOMED |
| 724751006 | Sleep-wake schedule disorder due to jet lag                            | SNOMED |
| 1.05E+14  | Acquired central alveolar hypoventilation                              | SNOMED |
| 762348004 | Acute insomnia                                                         | SNOMED |
| 248262001 | Always sleepy                                                          | SNOMED |
| 25753007  | Amphetamine-induced sleep disorder                                     | SNOMED |
| 787175002 | ANK3-related intellectual disability, sleep disturbance syndrome       | SNOMED |
| 722293005 | Autosomal dominant cerebellar ataxia, deafness and narcolepsy syndrome | SNOMED |
| 724749007 | Behaviorally induced hypersomnia                                       | SNOMED |
| 413638006 | Benign neonatal sleep myoclonus                                        | SNOMED |
| 111489007 | Breathing-related sleep disorder                                       | SNOMED |
| 56194001  | Caffeine-induced sleep disorder                                        | SNOMED |
| 24825006  | Central alveolar hypoventilation syndrome                              | SNOMED |
| 724748004 | Chronic insomnia                                                       | SNOMED |
| 9.15E+13  | Circadian rhythm disorder caused by drug                               | SNOMED |
| 1.35E+14  | Circadian rhythm sleep disorder caused by alcohol                      | SNOMED |

|           |                                                            |                  |
|-----------|------------------------------------------------------------|------------------|
| 248258007 | Circumstances interfere with sleep                         | SNOMED           |
| 3.18E+13  | Daytime hypersomnia                                        | SNOMED           |
| 194439006 | Disorders of excessive somnolence                          | SNOMED           |
| 3.15E+13  | Disruptions of 24 hour sleep-wake cycle                    | SNOMED           |
| 711565008 | Dream enactment behavior                                   | SNOMED           |
| 9.15E+13  | Drug-induced hypersomnia                                   | SNOMED           |
| 401236004 | Early morning waking                                       | SNOMED           |
| 429276004 | Environmental sleep disorder                               | SNOMED           |
| 230490003 | Excessive day and night-time sleepiness                    | SNOMED           |
| 230489007 | Excessive daytime sleepiness - normal night sleep          | SNOMED           |
| 230492006 | Excessive daytime sleepiness with sleep paralysis          | SNOMED           |
| 449160007 | Exploding head syndrome                                    | SNOMED           |
| 715829003 | Familial advanced sleep phase syndrome                     | SNOMED           |
| 83157008  | Fatal familial insomnia                                    | SNOMED           |
| 719972004 | Haddad syndrome                                            | SNOMED           |
| 1.35E+14  | Hypersomnia caused by alcohol                              | SNOMED           |
| 426943005 | Hypersomnia disorder related to menstruation               | SNOMED           |
| 230488004 | Hypersomnia of non-organic origin                          | SNOMED           |
| 724750007 | Hypersomnolence caused by substance                        | SNOMED           |
| 724752004 | Hypnogogic exploding head syndrome                         | SNOMED           |
| 2.88E+14  | Hyposomnia co-occurrent and due to psychological disorder  | SNOMED           |
| 429456008 | Hypoventilation during sleep due to neuromuscular disorder | SNOMED           |
| 3.73E+12  | Idiopathic hypersomnia                                     | SNOMED           |
| 2.35E+16  | Idiopathic hypersomnolence                                 | Nebraska Lexicon |
| 59050008  | Initial insomnia                                           | SNOMED           |
| 9.37E+13  | Insomnia co-occurrent and due to nocturnal myoclonus       | SNOMED           |

|           |                                                                                     |        |
|-----------|-------------------------------------------------------------------------------------|--------|
| 4.36E+14  | Insomnia due to anxiety and fear                                                    | SNOMED |
| 111488004 | Kleine-Levin syndrome                                                               | SNOMED |
| 162204000 | Late insomnia                                                                       | SNOMED |
| 724508005 | Late-onset central hypoventilation co-occurrent and due to hypothalamic dysfunction | SNOMED |
| 425881006 | Limit-setting sleep disorder                                                        | SNOMED |
| 443664006 | Long sleeper syndrome                                                               | SNOMED |
| 198437004 | Menopausal sleeplessness                                                            | SNOMED |
| 67233009  | Middle insomnia                                                                     | SNOMED |
| 54230003  | Mixed insomnia                                                                      | SNOMED |
| 60380001  | Narcolepsy                                                                          | SNOMED |
| 735676003 | Narcolepsy type 1                                                                   | SNOMED |
| 3.41E+13  | Nocturnal myoclonus                                                                 | SNOMED |
| 407666007 | Nocturnal sleep-related eating disorder                                             | SNOMED |
| 425476007 | Non-organic parasomnia                                                              | SNOMED |
| 1.06E+14  | Organic mixed sleep disorder                                                        | SNOMED |
| 9.97E+13  | Organic sleep-wake cycle disorder                                                   | SNOMED |
| 248261008 | Oversleeps                                                                          | SNOMED |
| 17402007  | Pavor diurnus                                                                       | SNOMED |
| 191999000 | Persistent hypersomnia                                                              | SNOMED |
| 191997003 | Persistent insomnia                                                                 | SNOMED |
| 418424006 | Post-radiotherapy somnolence syndrome                                               | SNOMED |
| 230491004 | Postviral excessive daytime sleepiness                                              | SNOMED |
| 789009003 | Primary central sleep apnea of prematurity                                          | SNOMED |
| 1.05E+14  | Primary hyposomnia                                                                  | SNOMED |
| 247951006 | Reaction to sudden wakening                                                         | SNOMED |
| 88982005  | Rebound insomnia                                                                    | SNOMED |
| 724753009 | Recurrent isolated sleep-related hallucinations                                     | SNOMED |
| 192004002 | Repeated rapid eye movement sleep interruptions                                     | SNOMED |
| 192008004 | Reversed sleep-wake cycle                                                           | SNOMED |
| 4.34E+14  | Secondary narcolepsy                                                                | SNOMED |



|           |                                                          |        |
|-----------|----------------------------------------------------------|--------|
| 4.34E+14  | Secondary narcolepsy with cataplexy                      | SNOMED |
| 4.34E+14  | Secondary narcolepsy without cataplexy                   | SNOMED |
| 428708005 | Secondary parasomnia                                     | SNOMED |
| 427426006 | Sleep attack                                             | SNOMED |
| 247962006 | Sleep automatism                                         | SNOMED |
| 723937009 | Sleep disorder caused by cannabis                        | SNOMED |
| 1.24E+16  | Sleep disorder caused by methamphetamine                 | SNOMED |
| 724699001 | Sleep disorder caused by nicotine                        | SNOMED |
| 724732000 | Sleep disorder caused by psychoactive substance          | SNOMED |
| 713524002 | Sleep disorder caused by reverse transcriptase inhibitor | SNOMED |
| 762334004 | Sleep disorder caused by stimulant                       | SNOMED |
| 737342004 | Sleep disorder caused by synthetic cannabinoid           | SNOMED |
| 762518003 | Sleep disorder caused by synthetic cathinone             | SNOMED |
| 4.68E+12  | Sleep disturbance in infancy                             | SNOMED |
| 192003008 | Sleep drunkenness                                        | SNOMED |
| 441877007 | Sleep dysfunction with sleep stage disturbance           | SNOMED |
| 426542005 | Sleep hypoventilation due to lower airway obstruction    | SNOMED |
| 277180005 | Sleep paralysis                                          | SNOMED |
| 2.89E+14  | Sleep related hypoxemia                                  | SNOMED |
| 8.50E+13  | Sleep related movement disorder                          | SNOMED |
| 277181009 | Sleep starts                                             | SNOMED |
| 426824009 | Sleep-onset association disorder                         | SNOMED |
| 429571005 | Sleep-related dissociative disorder                      | SNOMED |
| 230500006 | Sleep-related dystonia                                   | SNOMED |
| 429266002 | Sleep-related groaning                                   | SNOMED |
| 230497000 | Sleep-related head banging                               | SNOMED |

|           |                                                        |        |
|-----------|--------------------------------------------------------|--------|
| 724509002 | Sleep-related hypoventilation caused by substance      | SNOMED |
| 789046004 | Sleep-related movement disorder caused by drug         | SNOMED |
| 789047008 | Sleep-related movement disorder caused by substance    | SNOMED |
| 430390000 | Sleep-related neurogenic tachypnea                     | SNOMED |
| 230498005 | Sleep-related painful erections                        | SNOMED |
| 230499002 | Sleep-related respiratory failure                      | SNOMED |
| 54532007  | Sleep-wake schedule disorder, frequently changing type | SNOMED |
| 2.39E+13  | Somnambulism co-occurrent with sleep terror disorder   | SNOMED |
| 370971007 | Somnolence syndrome                                    | SNOMED |
| 363314000 | Substance-induced sleep disorder                       | SNOMED |
| 248259004 | Symptoms interfere with sleep                          | SNOMED |
| 67062000  | Terminal insomnia                                      | SNOMED |
| 268653004 | Transient hypersomnia                                  | SNOMED |
| 268652009 | Transient insomnia                                     | SNOMED |
| 230495008 | Transient sleep-wake rhythm disorder                   | SNOMED |
| 248260009 | Unrefreshed by sleep                                   | SNOMED |

#### Tachycardia

| Code      | Name                                                                    | Vocabulary |
|-----------|-------------------------------------------------------------------------|------------|
| 80313002  | Palpitations                                                            | SNOMED     |
| 3424008   | Tachycardia                                                             | SNOMED     |
| 278086000 | Baseline tachycardia                                                    | SNOMED     |
| 161968007 | Bumping heart                                                           | SNOMED     |
| 462170003 | Fetal supraventricular tachycardia with long ventriculoatrial interval  | SNOMED     |
| 462169004 | Fetal supraventricular tachycardia with short ventriculoatrial interval | SNOMED     |
| 240298005 | Fetal tachycardia                                                       | SNOMED     |

|           |                                                  |        |
|-----------|--------------------------------------------------|--------|
| 4006006   | Fetal tachycardia affecting management of mother | SNOMED |
| 161969004 | Fluttering heart                                 | SNOMED |
| 102590007 | Intermittent palpitations                        | SNOMED |
| 2.40E+14  | Irregular palpitations                           | SNOMED |
| 162992001 | O/E - pulse rate tachycardia                     | SNOMED |
| 248648003 | Palpitations - rapid                             | SNOMED |
| 428919002 | Palpitations with regular rhythm                 | SNOMED |
| 709065005 | Postoperative fluttering heart                   | SNOMED |
| 248657009 | Pounding heart                                   | SNOMED |
| 442515000 | Reflex tachycardia                               | SNOMED |
| 2.40E+14  | Regular palpitations                             | SNOMED |
| 11092001  | Sinus tachycardia                                | SNOMED |
| 421348006 | Tachycardia - baseline fetal heart rate          | SNOMED |
| 74615001  | Tachycardia-bradycardia                          | SNOMED |

SNOMED, Systematic Nomenclature of Medicine; ICD9CM, International Classification of Diseases Ninth Revision Clinical Modification; HCPCS, Healthcare Common Procedure Coding System; CPT4, Current Procedural Terminology 4; OMOP, Observational Medical Outcomes Partnership
